# Supplementary material for: Molecular Networking Leveraging the Secondary Metabolomes Space of Halophila stipulaceae (Forsk.) Aschers. and Thalassia hemprichii (Ehrenb. ex Solms) Asch. in Tandem with Their Chemosystematics and Antidiabetic Potentials
Source: MDPI journal article supplement (doi:10.3390/md19050279), 2021-05-18
Supplement: s1 [file s1]

## Supplementary Data

# **Molecular Networking Leveraging the Secondary Metabolomes Space of *Halophila stipulaceae* (Forsk.) Aschers. and *Thalassia hemprichii* (Ehrenb. ex Solms) Asch. in Tandem with Their Chemosystematics and Antidiabetic Potentials**

**Nesrine M. Hegazi<sup>1</sup>, Hamada H. Saad<sup>1,2\*\*\*</sup>, Mona M. Marzouk<sup>1</sup>, Mohamed F. Abdel Rahman<sup>3</sup>, Mahitab H. El Bishbishy<sup>4</sup>, Ahmed Zayed<sup>5,6</sup>, Roland Ulber<sup>5\*</sup>, Shahira M. Ezzat<sup>4,7\*\*</sup>**

<sup>1</sup> Department of Phytochemistry and Plant Systematics, Division of Pharmaceutical Industries, National Research Centre, Dokki, Cairo, Egypt. nm.hegazi@nrc.sci.eg & monakhalil66@hotmail.com

<sup>2</sup> Department of Pharmaceutical Biology, Pharmaceutical Institute, Eberhard Karls University of Tübingen, PO Box 72074, Tübingen, Germany. hamada.saad@pharm.uni-tuebingen.de

<sup>3</sup> Department of Biology and Biochemistry, School of Life and Medical Sciences, University of Hertfordshire Hosted by Global Academic Foundation, Cairo, Egypt. m.farouk@gaf.edu.eg

<sup>4</sup> Department of Pharmacognosy, Faculty of Pharmacy, October University for Modern Sciences and Arts (MSA), Giza 12451, Egypt. mahelmy@msa.eun.eg

<sup>5</sup> Institute of Bioprocess Engineering, Technical University of Kaiserslautern, Gottlieb-Daimler-Straße 49, 67663 Kaiserslautern, Germany. ulber@mv.uni-kl.de & zayed@mv.uni-kl.de

<sup>6</sup> Department of Pharmacognosy, Tanta University, College of Pharmacy, El-Guish Street, 31527 Tanta, Egypt. ahmed.zayed1@pharm.tanta.edu.eg

<sup>7</sup> Department of Pharmacognosy, Faculty of Pharmacy, Cairo University, Kasr El-Aini Street, Cairo 11562, Egypt. shahira.ezzat@pharma.cu.edu.eg

### **\*Corresponding author**

Institute of Bioprocess Engineering, Technical University of Kaiserslautern, Gottlieb-Daimler-Straße 49, 67663 Kaiserslautern, Germany  
Tel.: +49 (0) 631 205 4043; Fax: +49 631 205-4312

### **\*\*Co-Corresponding author**

Department of Pharmacognosy, Faculty of Pharmacy, Cairo University, Cairo 11562, Egypt.  
Department of Pharmacognosy, Faculty of Pharmacy, October University for Modern Sciences and Arts (MSA), Giza 12451, Egypt. shahira.ezzat@pharma.cu.edu.eg; Tel.: +20-120-000-4301

### **\*\*\*Co-Corresponding author**

Department of Phytochemistry and Plant Systematics, Division of Pharmaceutical Industries, National Research Centre, Dokki, Cairo, Egypt. Department of Pharmaceutical Biology, Pharmaceutical Institute, Eberhard Karls University of Tübingen, PO Box 72074, Tübingen, Germany. hamada.saad@pharm.uni-tuebingen.de

## Table of contents

### Supplementary Tables

|                                                                                                                                                                                 |           |
|---------------------------------------------------------------------------------------------------------------------------------------------------------------------------------|-----------|
| <b>Table S1:</b> Distribution and <sup>1</sup> H-NMR of the isolated aglycones among <i>Halophila stipulaceae</i> ( <i>Hs</i> ) and <i>Thalassia hempiricii</i> ( <i>Th</i> )   | <b>4</b>  |
| <b>Table S2:</b> Compounds assignment of <i>Halophila stipulaceae</i> ( <i>Hs</i> ) and <i>Thalassia hempiricii</i> ( <i>Th</i> ) extracts as revealed by UPLC-HRMS/MS analysis | <b>5</b>  |
| <b>Table S3:</b> Results of Enzymes inhibition assays of <i>Hs</i> and <i>Th</i> extracts                                                                                       | <b>21</b> |
| <b>Table S4:</b> Summary of the biomarkers in different study groups of diabetic rats                                                                                           | <b>21</b> |

### Supplementary Figures

|                                                                                                                                                                                                                           |           |
|---------------------------------------------------------------------------------------------------------------------------------------------------------------------------------------------------------------------------|-----------|
| <b>Fig. S1.</b> HPLC profile of the <i>Halophila stipulaceae</i> ( <i>Hs</i> ) extract detected at wavelengths 210, 250, 285, 375 nm.                                                                                     | <b>22</b> |
| <b>Fig. S2.</b> HPLC profile of <i>Thalassia hempiricii</i> ( <i>Th</i> ) extract detected at wavelengths 210, 250, 285, 375 nm.                                                                                          | <b>22</b> |
| <b>Fig. S3.</b> The base peak chromatograms (BPC) of <i>Halophila stipulaceae</i> ( <i>Hs</i> ) extract (blue) and <i>Thalassia hempiricii</i> ( <i>Th</i> ) extract (red) in the negative ionization mode.               | <b>23</b> |
| <b>Fig. S4.</b> The base peak chromatograms (BPC) of <i>Halophila stipulaceae</i> ( <i>Hs</i> ) extract (blue) and <i>Thalassia hempiricii</i> ( <i>Th</i> ) extract (red) in the positive ionization mode.               | <b>23</b> |
| <b>Fig. S5.</b> Enlarged positive molecular network created using MS/MS data (positive mode) from <i>Halophila stipulaceae</i> ( <i>Hs</i> ) (purple nodes) and <i>Thalassia hempiricii</i> ( <i>Th</i> ) (yellow nodes). | <b>24</b> |
| <b>Fig. S6.</b> Proposed fragmentation scheme and MS <sup>2</sup> spectrum of methoxy benzoic acid - <i>O</i> -sulphate, <b>16</b>                                                                                        | <b>24</b> |
| <b>Fig. S7.</b> Proposed fragmentation scheme and MS <sup>2</sup> spectrum of dimethoxy benzoic acid- <i>O</i> -sulphate, <b>30</b> .                                                                                     | <b>25</b> |
| <b>Fig. S8.</b> Proposed fragmentation scheme and MS <sup>2</sup> spectrum of <i>O</i> -caffeoyl <i>O</i> -hydroxyldimethoxybenzoyl tartaric acid, <b>26</b> .                                                            | <b>25</b> |
| <b>Fig. S9.</b> Proposed fragmentation scheme and MS <sup>2</sup> spectrum of methoxypentahydroxyflavanone- <i>O</i> -hexoside, <b>28</b> .                                                                               | <b>26</b> |
| <b>Fig. S10.</b> Proposed fragmentation scheme and MS <sup>2</sup> spectra of acetylated rebaudioside, <b>96</b> vs. its non-acetylated ascendant, rebaudioside ; <b>72</b>                                               | <b>26</b> |
| <b>Fig. S11.</b> EIC of syphonoside, <b>53</b> in both extracts                                                                                                                                                           | <b>27</b> |
| <b>Fig. S12.</b> Proposed fragmentation scheme and MS <sup>2</sup> spectrum of syphonoside, <b>53</b> in both extracts                                                                                                    | <b>27</b> |

### Supplementary Results and Discussion

|                              |           |
|------------------------------|-----------|
| Compounds annotation, lipids | <b>28</b> |
| <b>References</b>            | <b>30</b> |

### Supplementary Tables

**Table S1:** Distribution and <sup>1</sup>H-NMR of the isolated aglycones among *Halophila stipulaceae* (*Hs*) and *Thalassia hemprichii* (*Th*)

| Isolated aglycones  | <i>Hs</i> | <i>Th</i> | <sup>1</sup> H-NMR (500 MHz in DMSO- <i>d</i> <sub>6</sub> , δ, ppm, J/Hz)                                                                                                                                              | References |
|---------------------|-----------|-----------|-------------------------------------------------------------------------------------------------------------------------------------------------------------------------------------------------------------------------|------------|
| Apigenin            | +++       | ++        | 12.91(1H, s, 5-OH), 7.91 (2H, d, <i>J</i> = 8.7 Hz, H-2',H-6'), 6.92 (2H, d, <i>J</i> = 8.7 Hz, H-3', H-5'), 6.72 (1H, s, H-3), 6.51 (1H, d, <i>J</i> = 2.0 Hz, H-8), 6.2 (1H, d, <i>J</i> = 2.0 Hz, H-6)               | [1]        |
| Genkwanin           | +         | t         | Co-PC                                                                                                                                                                                                                   | [2]        |
| Scutellarein        | -         | ++        | Co-PC                                                                                                                                                                                                                   | [3]        |
| Isoscutellarein     | -         | +++       | 13.01(1H, s, 5-OH), 7.89 (2H, d, <i>J</i> = 8.6 Hz, H-2',H-6'), 6.88 (2H, d, <i>J</i> = 8.7 Hz, H-3', H-5'), 6.76 (1H, s, H-3), 6.18 (1H, s, H-6)                                                                       | [3]        |
| Hispidulin          | -         | +         | Co-PC                                                                                                                                                                                                                   | [4]        |
| Cirsimaritin        | ++        | +         | 13.01(1H, s, 5-OH), 8.01 (2H, d, <i>J</i> = 8.6 Hz, H-2',H-6'), 6.98 (2H, d, <i>J</i> = 8.7 Hz, H-3', H-5'), 6.85 (1H, s, H-8), 6.73 (1H, s, H-3), 3.83 (3H, s, 7-OCH <sub>3</sub> ), 3.71 (3H, s, 6-OCH <sub>3</sub> ) | [5]        |
| Luteolin            | ++        | ++        | 12.98 (1H, s, 5-OH), 7.42 (2H, m, H-2', H6'), 6.87 (1H, d, <i>J</i> = 8.5 Hz, H-5'), 6.65 (1H, s, H3), 6.43 (1H, d, <i>J</i> =2.0Hz, H-8), 6.18 (1H, d, <i>J</i> = 2.0Hz, H-6)                                          | [1]        |
| Chrysoeriol         | ++        | +         | 12.96 (1H, s, 5-OH), 7.58 (2H, m, H-2', H6'), 6.93 (1H, d, <i>J</i> = 8.4 Hz, H-5'), 6.75 (1H, s, H3), 6.53 (1H, d, <i>J</i> =2.1Hz, H-8), 6.18 (1H, d, <i>J</i> = 2.1Hz, H-6)                                          | [1]        |
| 6-hydroxyl luteolin | -         | +++       | 13.05 (1H, s, 5-OH), 10.33 (1H, s, 6-OH), 7.44 (2H, m, H-2', H6'), 6.98 (1H, d, <i>J</i> = 8.5 Hz, H-5'), 6.58 (1H, s, H3), 6.43 (1H, d, s, H-8)                                                                        | [4]        |
| Pedalitin           | t         | +         | Co-PC                                                                                                                                                                                                                   | [5]        |

+++; major, ++; strong, +, present, t; trace,-; absent, Co-PC; Comparative paper chromatography with authentic samples

**Table S2:** Compound assignment of *Halophila stipulaceae* (Hs) and *Thalassia hemphiricii* (Th) extracts as revealed by UPLC-HRMS/MS analysis

| No. | Rt   | Compound class                         | Compound Assignment                                    | [M-H] <sup>-</sup> | [M+CH <sub>2</sub> O <sub>2</sub> -H] <sup>-</sup> | [M+H] <sup>+</sup> | MS <sup>2</sup>          |            | Molecular formula (error in ppm)                       | Hs | Th | References                   |
|-----|------|----------------------------------------|--------------------------------------------------------|--------------------|----------------------------------------------------|--------------------|--------------------------|------------|--------------------------------------------------------|----|----|------------------------------|
|     |      |                                        |                                                        |                    |                                                    |                    | -ve                      | +ve        |                                                        |    |    |                              |
| 1   | 5.8  | Organic acid                           | Malic acid <sup>c</sup>                                | 133.0143           |                                                    |                    | 115                      |            | C <sub>4</sub> H <sub>6</sub> O <sub>5</sub> (0.3)     | √  | √  | [6]                          |
| 2   | 5.91 | Organic acid                           | Citric acid <sup>c</sup>                               | 191.0197           |                                                    |                    | 111                      |            | C <sub>6</sub> H <sub>8</sub> O <sub>7</sub> (0.3)     |    | √  | Marzouk <i>et al.</i> , 2018 |
| 3   | 7.7  | Amino acid                             | Tyrosine <i>O</i> -sulfate <sup>c</sup>                | 260.0234           |                                                    |                    | 180<br>163<br>146<br>119 |            | C <sub>9</sub> H <sub>11</sub> NO <sub>6</sub> S (0.0) | √  | √  |                              |
| 4   | 7.95 | Organic acid                           | Succinic acid <sup>c</sup>                             | 117.0194           |                                                    |                    |                          |            | C <sub>4</sub> H <sub>6</sub> O <sub>4</sub> (0.8)     | √  | √  |                              |
| 5   | 9.1  | Aromatic heterocyclic organic compound | Indoline <sup>c</sup>                                  |                    |                                                    | 120.0810           |                          | 103        | C <sub>8</sub> H <sub>9</sub> N (1.8)                  |    | √  | GNPS libraries               |
| 6   | 9.16 | Amino acid                             | Phenylalanine <sup>c</sup>                             |                    |                                                    | 166.0866           |                          | 120<br>103 | C <sub>9</sub> H <sub>11</sub> NO <sub>2</sub> (2.59)  |    | √  |                              |
| 7   | 9.48 | Fatty acid                             | Aminooctanedioic acid <sup>c</sup>                     | 188.0930           |                                                    |                    | 173<br>117               |            | C <sub>8</sub> H <sub>15</sub> NO <sub>4</sub> (0.9)   |    | √  |                              |
| 8   | 9.5  | Benzoic acid ester                     | Vanillic acid- <i>O</i> -glucoside isomer <sup>c</sup> | 329.0874           |                                                    |                    | 209<br>167<br>123        |            | C <sub>14</sub> H <sub>18</sub> O <sub>9</sub> (0.3)   |    | √  | [10]                         |
| 9   | 9.55 | Aromatic heterocyclic organic compound | Tetrahydroxyoctahydro-indolizine <sup>c</sup>          | 188.0932           |                                                    |                    | 170<br>144<br>118        |            | C <sub>8</sub> H <sub>15</sub> NO <sub>4</sub> (0.9)   |    | √  | Rajana <i>et al.</i> , 2018  |

|    |       |                                        |                                                                                   |          |          |                          |                                                        |                                                                      |   |                |
|----|-------|----------------------------------------|-----------------------------------------------------------------------------------|----------|----------|--------------------------|--------------------------------------------------------|----------------------------------------------------------------------|---|----------------|
| 10 | 9.8   | Benzaldehyde                           | Vanillin- <i>O</i> -glucoside <sup>e</sup>                                        | 313.0927 |          | 151<br>135<br>107        | C <sub>14</sub> H <sub>18</sub> O <sub>8</sub> (0.8)   | √                                                                    | √ | [11]           |
| 11 | 10.07 | Benzoic acid                           | Syringic acid- <i>O</i> -glucoside <sup>e</sup>                                   | 359.0982 |          | 197<br>153<br>138<br>123 | C <sub>15</sub> H <sub>20</sub> O <sub>10</sub> (0.4)  | √                                                                    | √ | [12]<br>[13]   |
| 12 | 10.08 | Cinnamic acid                          | Hydroxyphenyl-sulfooxypropanoic acid <sup>e</sup><br>(tichocarpol A) <sup>e</sup> | 261.0072 |          | 181<br>163<br>135        | C <sub>9</sub> H <sub>10</sub> O <sub>7</sub> S (0.82) | √                                                                    |   | [14]           |
| 13 | 10.81 | Benzoic acid                           | Vanillic acid- <i>O</i> -glucoside isomer <sup>e</sup>                            | 329.0875 |          | 167<br>153               | C <sub>14</sub> H <sub>18</sub> O <sub>9</sub> (1.1)   |                                                                      | √ | [12]           |
| 14 | 11.24 | Amino acid                             | Tryptophan <sup>d</sup>                                                           |          | 205.1033 |                          | 146                                                    | C <sub>11</sub> H <sub>12</sub> N <sub>2</sub> O <sub>2</sub> (-4.4) | √ | GNPS libraries |
| 15 | 11.3  | Aromatic heterocyclic organic compound | Indole Acrylic acid <sup>e</sup>                                                  |          | 188.0712 |                          | 146                                                    | C <sub>11</sub> H <sub>9</sub> NO <sub>2</sub> (-3.3)                | √ |                |
| 16 | 11.4  | Benzoic acid                           | Methoxy benzoic acid - <i>O</i> -sulphate <sup>f</sup>                            | 230.9970 |          | 151<br>107               | C <sub>8</sub> H <sub>8</sub> O <sub>6</sub> S (2.7)   | √                                                                    | √ |                |
| 17 | 11.6  | Cinnamic acid ester                    | <i>O</i> -Caffeoyl tartaric acid (Caftaric acid) <sup>d</sup>                     | 311.0439 | -        | 179<br>149<br>135        | -                                                      | C <sub>13</sub> H <sub>12</sub> O <sub>9</sub> (0.1)                 | √ | [15]           |
| 18 | 11.9  | Benzoic acid                           | Protocatechuic acid <sup>d</sup>                                                  | 153.0194 |          | 109                      | C <sub>7</sub> H <sub>6</sub> O <sub>4</sub> (0.6)     |                                                                      | √ | [16]           |
| 19 | 12.33 | Cinnamic acid                          | Sinapic acid- <i>O</i> - glucoside <sup>d</sup>                                   | 385.1138 |          | 223<br>206<br>179<br>165 | C <sub>17</sub> H <sub>22</sub> O <sub>10</sub> (0.5)  |                                                                      | √ | [17]           |
| 20 | 12.33 | Cinnamic acid                          | Coumaric acid- <i>O</i> - glucoside <sup>d</sup><br>(Isomer I)                    | 325.0923 |          | 163<br>145<br>119        | C <sub>15</sub> H <sub>18</sub> O <sub>8</sub> (1.7)   | √                                                                    | √ | [12]           |

|    |       |                                        |                                                                                     |          |          |                                 |            |                                                        |   |                     |
|----|-------|----------------------------------------|-------------------------------------------------------------------------------------|----------|----------|---------------------------------|------------|--------------------------------------------------------|---|---------------------|
| 21 | 12.49 | Cinnamic acid                          | Dihydrocoumaroyl- <i>O</i> -glucoside <sup>e</sup> (Isomer I)                       | 327.1081 | -        | 165<br>121                      | -          | C <sub>15</sub> H <sub>20</sub> O <sub>8</sub> (0.6)   | √ | [18]                |
| 22 | 12.51 | Aromatic heterocyclic organic compound | Ethenyl indole <sup>e</sup>                                                         | -        | 144.0811 | -                               | 117        | C <sub>10</sub> H <sub>9</sub> N (-2.7)                | √ | GNPS libraries      |
| 23 | 12.57 | Cinnamic acid                          | Dihydrocoumaroyl- <i>O</i> -glucoside <sup>e</sup> (Isomer II)                      | 327.1083 |          | 165<br>121                      |            | C <sub>15</sub> H <sub>20</sub> O <sub>8</sub> (0.6)   | √ | [18]                |
| 24 | 12.81 | Cinnamic acid                          | Coumaric acid- <i>O</i> - glucoside <sup>d</sup> (Isomer II)                        | 325.0932 |          | 163<br>145<br>119               |            | C <sub>15</sub> H <sub>18</sub> O <sub>8</sub> (0.9)   | √ | [12]                |
| 25 | 12.9  | Flavone                                | Drymariatin A (rhamnosyl)ethenyl-trihydroxyflavone <sup>e</sup>                     | -        | 459.1299 | -                               | 283        | C <sub>23</sub> H <sub>22</sub> O <sub>10</sub> (3.7)  | √ | [19]                |
| 26 | 13.03 | Cinnamic acid                          | <i>O</i> -Caffeoyl <i>O</i> - hydroxyl dimethoxy benzoyl tartaric acid <sup>f</sup> | 491.0829 |          | 329<br>311<br>179<br>149<br>135 |            | C <sub>22</sub> H <sub>20</sub> O <sub>13</sub> (0.9)  | √ |                     |
| 27 | 13.15 | Flavone                                | Apigenin di- <i>O</i> - glucoside <sup>e</sup>                                      | -        | 595.1672 | -                               | 433<br>271 | C <sub>27</sub> H <sub>30</sub> O <sub>15</sub> (2.4)  | √ | [20]                |
| 28 | 13.41 | Flavanone                              | Hexahydroxy-mono-methoxyflavanone- <i>O</i> -glucoside <sup>f</sup>                 | -        | 513.1254 | -                               | 351<br>333 | C <sub>22</sub> H <sub>24</sub> O <sub>14</sub> (3.04) | √ | [21]                |
| 29 | 13.48 | Flavone                                | Chrysoeriol - <i>O</i> - diglucoside <sup>e</sup>                                   | -        | 625.1785 | -                               | 463<br>301 | C <sub>28</sub> H <sub>32</sub> O <sub>16</sub> (3.51) | √ | GNPS libraries [22] |
| 30 | 13.25 | Benzoic acid                           | Dimethoxy benzoic acid- <i>O</i> -sulphate <sup>f</sup>                             | 261.0075 |          | 181<br>137                      |            | C <sub>9</sub> H <sub>10</sub> O <sub>7</sub> S (0.0)  | √ |                     |
| 31 | 13.3  | Cinnamic acid                          | Ferulic acid- <i>O</i> - glucoside <sup>e</sup>                                     | 355.1035 |          | 193<br>175                      |            | C <sub>16</sub> H <sub>20</sub> O <sub>9</sub> (0.2)   | √ | [23]                |

|           |       |                |                                                                   |          |          |                                 |                   |                                                                     |   |                   |
|-----------|-------|----------------|-------------------------------------------------------------------|----------|----------|---------------------------------|-------------------|---------------------------------------------------------------------|---|-------------------|
| <b>32</b> | 13.5  | Cinnamic acid  | <i>O</i> -Coumaroyl tartaric acid (Coutaric acid) <sup>d</sup>    | 295.0460 | -        | 161<br>135<br>163<br>119        | -                 | C <sub>13</sub> H <sub>12</sub> O <sub>8</sub> (0.1)                | √ | [15]              |
| <b>33</b> | 13.9  | Flavanone      | Tetrahydroxy flavanone- <i>O</i> -glucoside <sup>e</sup>          | 449.1090 | -        | 287<br>269<br>259<br>179<br>149 | -                 | C <sub>21</sub> H <sub>22</sub> O <sub>11</sub> (0.4)               | √ | [24]              |
| <b>34</b> | 13.93 | Cinnamic acid  | Caffeic acid- <i>O</i> -sulphate <sup>d</sup>                     | 258.9919 |          | 179<br>135                      |                   | C <sub>9</sub> H <sub>8</sub> O <sub>7</sub> S (-0.2)               | √ | [25]              |
| <b>35</b> | 14.27 | Benzoic acid   | <i>p</i> -hydroxy benzoic acid <sup>c,d</sup>                     | 137.0244 |          | 109                             |                   | C <sub>7</sub> H <sub>6</sub> O <sub>3</sub> (0.6)                  | √ | [13, 26]          |
| <b>36</b> | 14.57 | Flavone        | Dihydroxy dimethoxy flavone- <i>O</i> - glucoside <sup>d, e</sup> | -        | 477.1404 | -                               | 315               | C <sub>23</sub> H <sub>24</sub> O <sub>11</sub> (3.1)               | √ | √ [27]            |
| <b>37</b> | 14.59 | Flavone        | 6-Hydroxyl luteolin - <i>O</i> -glucoside <sup>d</sup> (Isomer I) | 463.0884 | -        | 301                             | -                 | C <sub>21</sub> H <sub>20</sub> O <sub>12</sub> (0.6)               | √ | √ [28]            |
| <b>38</b> | 14.7  | Cinnamic amide | Dicoumaroyl spermidine <sup>e</sup> (Isomer I)                    | -        | 438.2405 | -                               | 292<br>204<br>147 | C <sub>25</sub> H <sub>31</sub> N <sub>3</sub> O <sub>4</sub> (2.5) | √ | [29]              |
| <b>39</b> | 14.9  | Cinnamic acid  | Caffeic acid <sup>c,d</sup>                                       | 179.0351 | 181.0502 | 135                             | 163<br>135        | C <sub>8</sub> H <sub>8</sub> O <sub>4</sub> (-0.4)                 | √ | [13]              |
| <b>40</b> | 15.0  | Cinnamic acid  | Caffeoyl malic acid <sup>e</sup>                                  | 295.0461 | -        | 179<br>133                      | -                 | C <sub>13</sub> H <sub>12</sub> O <sub>8</sub> (-1.4)               | √ | [30]              |
| <b>41</b> | 15.03 | Coumarin       | Esculetin (dihydroxycoumarin) <sup>e</sup>                        | 177.0193 | -        | 149<br>133                      | -                 | C <sub>9</sub> H <sub>6</sub> O <sub>4</sub> (0.34)                 | √ | GNPS library      |
| <b>42</b> | 15.2  | Flavone        | 6-Hydroxyl luteolin - <i>O</i> -rutinoside <sup>e</sup>           | 609.1463 | 611.1616 | 301                             | 303               | C <sub>27</sub> H <sub>30</sub> O <sub>16</sub> (0.5)               | √ | GNPS library [31] |
| <b>43</b> | 15.37 | Cinnamic amide | Dicoumaroyl spermidine (Isomer II) <sup>e</sup>                   | -        | 438.2401 | -                               | 292,<br>2041      | C <sub>25</sub> H <sub>31</sub> N <sub>3</sub> O <sub>4</sub> (3.6) | √ | [29]              |

|    |       |                            |                                                                                     |          |          |                                                      |     |                                                          |   |                                |  |
|----|-------|----------------------------|-------------------------------------------------------------------------------------|----------|----------|------------------------------------------------------|-----|----------------------------------------------------------|---|--------------------------------|--|
|    |       |                            |                                                                                     |          |          |                                                      |     | 47                                                       |   |                                |  |
| 44 | 15.4  | Benzoic acid               | Dihydroxybenzoylmethyl ester-(- <i>O</i> -vanilloyl)-xylosyl glucoside <sup>e</sup> | 611.1619 | -        | 461<br>311<br>167                                    | -   | C <sub>27</sub> H <sub>32</sub> O <sub>16</sub> (0.2)    | √ | [32]                           |  |
| 45 | 15.9  | Flavone                    | Luteolin <i>O</i> -glucoside sulphate sodium salt <sup>e</sup>                      | 549.0313 |          | 285                                                  |     | C <sub>21</sub> H <sub>19</sub> NaO <sub>14</sub> S      | √ | [33]                           |  |
| 46 | 16.0  | Flavone                    | Luteolin 7- <i>O</i> -glucoside sulphate (Thalassiolin A) <sup>e</sup>              | 527.0501 | 529.0662 | 447<br>285<br>241<br>151                             |     | C <sub>21</sub> H <sub>20</sub> O <sub>14</sub> S (0.16) | √ | [33]                           |  |
| 47 | 16.13 | Flavone                    | Luteolin- <i>O</i> -glucoside <sup>d</sup> (Isomer II)                              | 2.0884   |          | 285                                                  |     | C <sub>21</sub> H <sub>20</sub> O <sub>11</sub> (1.6)    | √ | √ [34]                         |  |
| 48 | 16.13 | Flavone                    | 6-Hydroxyl luteolin - <i>O</i> -glucoside <sup>d</sup>                              | 463.0878 | 465.1036 | 301<br>271                                           | 303 | C <sub>21</sub> H <sub>20</sub> H <sub>12</sub> (-0.2)   | √ | [31]                           |  |
| 49 | 16.7  | Flavone                    | Luteolin- <i>O</i> -glucoside <sup>d</sup>                                          | 447.0938 | 44089    | 285                                                  | 287 | C <sub>21</sub> H <sub>20</sub> O <sub>11</sub> (0.7)    | √ | Enerstvedt <i>et al.</i> 2016) |  |
| 50 | 16.2  | Flavone                    | Luteolin <sup>d</sup>                                                               |          | 287.0557 |                                                      | 151 | C <sub>15</sub> H <sub>10</sub> O <sub>6</sub> (-4.8)    | √ | [28]                           |  |
| 51 | 16.24 | Flavone                    | Pedalitin- <i>O</i> - glucoside <sup>e</sup>                                        | 477.1038 | 479.1195 | 315<br>300                                           | 317 | C <sub>22</sub> H <sub>22</sub> O <sub>12</sub> (0.08)   | √ | √ GNPS libraries [35]          |  |
| 52 | 16.3  | Flavanone                  | Pentahydroxy flavanone- <i>O</i> -glucoside <sup>e</sup>                            | 465.1036 |          | 303                                                  |     | C <sub>21</sub> H <sub>22</sub> O <sub>12</sub> (2.1)    | √ | [36]                           |  |
| 53 | 16.5  | Macrocyclic glycoterpenoid | Syphonoside <sup>a</sup>                                                            | 831.3645 |          | 785<br>683<br>623<br>581<br>521<br>479<br>461<br>317 |     | C <sub>38</sub> H <sub>58</sub> O <sub>17</sub> (0.1)    | √ | √ [37]                         |  |



|           |       |               |                                                                           |          |          |                                        |                   |                                                          |   |   |                      |
|-----------|-------|---------------|---------------------------------------------------------------------------|----------|----------|----------------------------------------|-------------------|----------------------------------------------------------|---|---|----------------------|
| <b>54</b> | 16.89 | Flavone       | 6-Hydroxyl luteolin- <i>O</i> -malonyl glucoside <sup>e</sup>             | 549.0879 | 551.1052 | 505<br>463<br>301<br>271<br>255<br>179 | 303               | C <sub>24</sub> H <sub>22</sub> O <sub>15</sub> (1.3)    | √ |   | [38]                 |
| <b>55</b> | 17.33 | Flavone       | 6-Hydroxyl luteolin <sup>a</sup>                                          |          | 303.0505 |                                        |                   | C <sub>15</sub> H <sub>10</sub> O <sub>7</sub> (-1.99)   | √ |   | [28]                 |
| <b>56</b> | 17.33 | Flavone       | 6-Hydroxyl luteolin - <i>O</i> -xyloside <sup>e</sup>                     | 433.0776 | 435.0931 | 301                                    | 303               | C <sub>20</sub> H <sub>18</sub> O <sub>11</sub> (2.1)    | √ |   | [39]                 |
| <b>57</b> | 17.38 | Cinnamic acid | <i>O</i> -Caffeoyl tartaric acid isomer <sup>d</sup>                      | 311.0561 |          | 179<br>149<br>135<br>113               |                   | C <sub>13</sub> H <sub>12</sub> O <sub>9</sub> (1.0)     | √ |   | [13]                 |
| <b>58</b> | 17.4  | Cinnamic acid | Di- <i>O</i> -caffeoyl tartaric acid (Chicoric acid) <sup>d</sup>         | 473.0724 |          | 311<br>293<br>179<br>149<br>113        |                   | C <sub>22</sub> H <sub>18</sub> O <sub>12</sub> (0.5)    | √ |   | [15]                 |
| <b>59</b> | 17.5  | Flavone       | Chrysoeriol 7- <i>O</i> -glucoside sulphate (Thalassiolin B) <sup>e</sup> | 541.0635 | 543.0816 | 461<br>299                             | 461<br>299        | C <sub>22</sub> H <sub>22</sub> O <sub>14</sub> S (-3.6) | √ |   | [40]                 |
| <b>60</b> | 17.55 | Flavone       | Apigenin 7- <i>O</i> -glucoside sulphate (Thalassiolin C) <sup>e</sup>    | 511.0550 |          | 269                                    |                   | C <sub>21</sub> H <sub>20</sub> O <sub>13</sub> S (0.23) | √ |   | [40]                 |
| <b>61</b> | 17.77 | Flavone       | Scutellarein- <i>O</i> -glucoside <sup>d</sup>                            |          | 449.1086 |                                        | 287<br>245<br>177 | C <sub>21</sub> H <sub>20</sub> O <sub>11</sub> (-2.1)   | √ |   | [41]                 |
| <b>62</b> | 17.78 | Flavone       | Monohydroxy trimethoxy flavone- <i>O</i> - glucoside <sup>e</sup>         |          | 491.1555 |                                        | 329<br>314        | C <sub>24</sub> H <sub>26</sub> O <sub>11</sub> (1.48)   | √ |   | [42, 43]             |
| <b>63</b> | 17.9  | Flavone       | Apigenin 7- <i>O</i> -glucoside <sup>b,c</sup>                            | 431.0988 | 433.1135 | 269                                    | 271               | C <sub>21</sub> H <sub>20</sub> O <sub>10</sub> (1.32)   | √ | √ | GNPS libraries, [44] |
| <b>64</b> | 17.9  | Cinnamic acid | Coumaric acid <sup>d,c,d</sup>                                            | 163.0402 |          | 119                                    |                   | C <sub>9</sub> H <sub>8</sub> O <sub>3</sub> (0.8)       | - | √ | [45]                 |
| <b>65</b> | 18.0  | Lignan        | Trilobatin E <sup>e</sup>                                                 |          | 889.1082 |                                        | 563               | C <sub>43</sub> H <sub>36</sub> O <sub>21</sub> (0.14)   | √ | - | [46]                 |

|           |       |                               |                                                                                  |          |          |     |     |                                                         |   |   |      |
|-----------|-------|-------------------------------|----------------------------------------------------------------------------------|----------|----------|-----|-----|---------------------------------------------------------|---|---|------|
|           |       |                               |                                                                                  |          |          |     | 455 |                                                         |   |   |      |
|           |       |                               |                                                                                  |          |          |     | 301 |                                                         |   |   |      |
| <b>66</b> | 18.03 | Flavone                       | Chrysoeriol- <i>O</i> -glucoside <sup>b</sup>                                    | 461.1095 | 463.1247 | 299 | 301 | C <sub>22</sub> H <sub>22</sub> O <sub>11</sub> (0.9)   | √ | √ | [44] |
|           |       |                               |                                                                                  |          |          | 283 |     |                                                         |   |   |      |
| <b>67</b> | 18.37 | Flavone                       | Isoscutellarein 7- <i>O</i> -xyloside <sup>c</sup>                               | 417.0828 |          | 285 |     | C <sub>20</sub> H <sub>18</sub> O <sub>10</sub> (-0.4)  |   | √ | [47] |
|           |       |                               |                                                                                  |          |          | 255 |     |                                                         |   |   |      |
|           |       |                               |                                                                                  |          |          | 227 |     |                                                         |   |   |      |
| <b>68</b> | 18.4  | Flavone                       | Carboxymethyl-<br>dihydroxyflavone <sup>c</sup>                                  | 311.0566 |          | 267 |     | C <sub>17</sub> H <sub>12</sub> O <sub>6</sub> (0.6)    |   | √ | [48] |
|           |       |                               |                                                                                  |          |          | 175 |     |                                                         |   |   |      |
| <b>69</b> | 18.47 | Flavone                       | Isoscutellarein 7- <i>O</i> -glucoside <sup>c</sup>                              | 447.0931 |          | 285 |     | C <sub>21</sub> H <sub>20</sub> O <sub>11</sub> (0.5)   |   | √ | [47] |
|           |       |                               |                                                                                  |          |          | 227 |     |                                                         |   |   |      |
| <b>70</b> | 18.5  | Flavone                       | 6-Hydroxy luteolin- <i>O</i> -acetyl<br>glucoside <sup>d, c</sup>                | 505.0976 | 507.1147 | 301 | 303 | C <sub>23</sub> H <sub>22</sub> O <sub>13</sub> (-2.7)  | √ |   | [28] |
|           |       |                               |                                                                                  |          |          | 300 |     |                                                         |   |   |      |
|           |       |                               |                                                                                  |          |          | 271 |     |                                                         |   |   |      |
|           |       |                               |                                                                                  |          |          | 255 |     |                                                         |   |   |      |
|           |       |                               |                                                                                  |          |          | 179 |     |                                                         |   |   |      |
| <b>71</b> | 18.6  | Chalcone                      | Phloridzin (Phloretin- <i>O</i> -<br>glucoside) <sup>d, c</sup>                  | 435.1296 |          | 273 |     | C <sub>21</sub> H <sub>24</sub> O <sub>10</sub> (0.1)   |   | √ | [39] |
|           |       |                               |                                                                                  |          |          | 179 |     |                                                         |   |   |      |
|           |       |                               |                                                                                  |          |          | 167 |     |                                                         |   |   |      |
| <b>72</b> | 18.91 | Steviol<br>glycoside          | Rebaudioside B <sup>c</sup>                                                      | 803.3714 |          | 641 |     | C <sub>38</sub> H <sub>60</sub> O <sub>18</sub> (0.9)   | √ |   | [49] |
|           |       |                               |                                                                                  |          |          | 479 |     |                                                         |   |   |      |
|           |       |                               |                                                                                  |          |          | 317 |     |                                                         |   |   |      |
|           |       |                               |                                                                                  |          |          | 161 |     |                                                         |   |   |      |
| <b>73</b> | 19.03 | Macrocyclic<br>glycoterpenoid | Syphonoside- <i>O</i> -acetate <sup>b</sup>                                      | 873.3759 |          | 827 |     | C <sub>40</sub> H <sub>60</sub> O <sub>18</sub> (0.8)   | √ | √ | [50] |
|           |       |                               |                                                                                  |          |          | 665 |     |                                                         |   |   |      |
|           |       |                               |                                                                                  |          |          | 623 |     |                                                         |   |   |      |
|           |       |                               |                                                                                  |          |          | 521 |     |                                                         |   |   |      |
|           |       |                               |                                                                                  |          |          | 461 |     |                                                         |   |   |      |
|           |       |                               |                                                                                  |          |          | 317 |     |                                                         |   |   |      |
| <b>74</b> | 19.25 | Cinnamic acid                 | <i>O</i> -Caffeoyl- <i>O</i> -coumaroyl<br>tartaric acid (Isomer I) <sup>d</sup> | 457.0777 |          | 295 |     | C <sub>22</sub> H <sub>18</sub> O <sub>11</sub> (0.1)   |   | √ | [15] |
|           |       |                               |                                                                                  |          |          | 163 |     |                                                         |   |   |      |
|           |       |                               |                                                                                  |          |          | 149 |     |                                                         |   |   |      |
| <b>75</b> | 19.26 | Flavone                       | Pedalitin- <i>O</i> -glucoside<br>sulphate <sup>f</sup>                          | 557.0601 |          | 315 |     | C <sub>22</sub> H <sub>22</sub> O <sub>15</sub> S (1.3) |   | √ | [51] |
|           |       |                               |                                                                                  |          |          | 300 |     |                                                         |   |   |      |
|           |       |                               |                                                                                  |          |          | 241 |     |                                                         |   |   |      |

|    |       |               |                                                                                |          |                                               |                                                        |   |        |
|----|-------|---------------|--------------------------------------------------------------------------------|----------|-----------------------------------------------|--------------------------------------------------------|---|--------|
| 76 | 19.39 | Flavone       | Apigenin - <i>O</i> - malonyl glucoside <sup>b</sup>                           | 519.1144 | 271                                           | C <sub>24</sub> H <sub>22</sub> O <sub>13</sub> (2.1)  | √ | [52]   |
| 77 | 19.53 | Acylglycerol  | Dihydroxy linolenoyl glycerol di- <i>O</i> -hexoside (Isomer I) <sup>e</sup>   | 753.3548 | 707<br>415<br>397<br>291<br>235<br>179<br>119 | C <sub>33</sub> H <sub>56</sub> O <sub>16</sub> (0.4)  | √ | √ [53] |
| 78 | 19.59 | Cinnamic acid | <i>O</i> -Caffeoyl- <i>O</i> -coumaroyl tartaric acid (Isomer II) <sup>d</sup> | 457.0777 | 295<br>163<br>149                             | C <sub>22</sub> H <sub>18</sub> O <sub>11</sub> (0.1)  | √ | [15]   |
| 79 | 19.6  | Flavone       | Chrysoeriol - <i>O</i> - malonyl-glucoside <sup>e</sup>                        | 549.1252 | 301                                           | C <sub>25</sub> H <sub>24</sub> O <sub>14</sub> (2.3)  | √ | [54]   |
| 80 | 19.68 | Cinnamic acid | <i>O</i> -Caffeoyl- <i>O</i> - feruloyl tartaric acid <sup>e</sup>             | 487.0880 | 325<br>193<br>179<br>161<br>149<br>135<br>113 | C <sub>23</sub> H <sub>20</sub> O <sub>12</sub> (1.0)  | √ | [55]   |
| 81 | 19.7  | Cinnamic acid | <i>O</i> -Feruloyl tartaric acid (fertaric acid) <sup>e</sup>                  | 325.0565 | 193                                           | C <sub>14</sub> H <sub>14</sub> O <sub>9</sub> (5.7)   | √ | [56]   |
| 82 | 19.9  | Flavone       | Dihydroxy dimethoxy flavone <sup>d,e</sup>                                     | 313.0718 | 175<br>147                                    | C <sub>17</sub> H <sub>14</sub> O <sub>6</sub> (0.3)   | √ | [39]   |
| 83 | 20.22 | Flavone       | 6-hydroxyl luteolin- <i>O</i> -coumaroyl glucoside (isomer I) <sup>d</sup>     | 609.1250 | 463<br>301                                    | C <sub>30</sub> H <sub>26</sub> O <sub>14</sub> (0.0)  | √ | [28]   |
| 84 | 20.29 | Flavone       | Dihydroxydimethoxy flavone - <i>O</i> -glucoside <sup>e</sup>                  | 477.1403 | 315                                           | C <sub>23</sub> H <sub>24</sub> O <sub>11</sub> (2.7)  | √ | √ [27] |
| 85 | 20.44 | Flavone       | Luteolin- <i>O</i> -sulphate <sup>b, c, d</sup>                                | 364.9965 | 285                                           | C <sub>15</sub> H <sub>10</sub> O <sub>9</sub> S (2.3) | √ | √ [39] |

|           |       |                                   |                                                                              |          |          |                          |     |                                                        |   |        |
|-----------|-------|-----------------------------------|------------------------------------------------------------------------------|----------|----------|--------------------------|-----|--------------------------------------------------------|---|--------|
| <b>86</b> | 20.78 | Fatty acid                        | Trihydroxy octadecadienoic acid (Isomer I) <sup>e</sup>                      | 329.2304 |          | 270<br>224               |     | C <sub>18</sub> H <sub>32</sub> O <sub>5</sub> (5.59)  | √ | [53]   |
| <b>87</b> | 20.89 | Flavone                           | 6-hydroxyl luteolin - <i>O</i> -coumaroyl glucoside (isomer II) <sup>d</sup> | 609.1247 |          | 463<br>301               |     | C <sub>30</sub> H <sub>26</sub> O <sub>14</sub> (0.42) | √ | [28]   |
| <b>88</b> | 21.17 | Flavonoid<br>Flavone<br>glycoside | Scutellarein - <i>O</i> - coumaroyl glucoside <sup>d</sup>                   | 593.1300 |          | 285<br>257<br>243        |     | C <sub>30</sub> H <sub>26</sub> O <sub>13</sub> (0.1)  | √ | [28]   |
| <b>89</b> | 21.24 | Flavone                           | Apigenin- <i>O</i> -acetyl glucoside <sup>e</sup>                            | 473.1088 | 475.1249 | 269                      | 271 | C <sub>23</sub> H <sub>22</sub> O <sub>11</sub> (1.0)  | √ | [44]   |
| <b>90</b> | 21.25 | Acylglycerol                      | Dihydroxy linolenoyl glycerol- <i>O</i> -hexoside (Isomer I) <sup>e</sup>    | 591.3027 |          | 383<br>291<br>275<br>253 |     | C <sub>27</sub> H <sub>46</sub> O <sub>11</sub> (0.8)  | √ | √ [53] |
| <b>91</b> | 21.29 | Cinnamic acid                     | Di- <i>O</i> -coumaroyl tartaric acid (Isomer I) <sup>d</sup>                | 441.0828 |          | 277<br>163               |     | C <sub>22</sub> H <sub>18</sub> O <sub>10</sub> (0.2)  | √ | [15]   |
| <b>92</b> | 21.38 | Benzoic acid                      | Ethyl protocatechuic acid <sup>e</sup>                                       | 181.0507 |          | 153<br>109<br>108        |     | C <sub>9</sub> H <sub>10</sub> O <sub>4</sub> (0.2)    | √ | [57]   |
| <b>93</b> | 21.48 | Cinnamic acid                     | Ferulic acid <sup>c,d</sup>                                                  | 193.0505 |          | 161<br>135<br>134        |     | C <sub>10</sub> H <sub>10</sub> O <sub>4</sub> (0.9)   | √ | [58]   |
| <b>94</b> | 21.68 | Flavone                           | Chrysoeriol- <i>O</i> -glucoside <sup>d</sup>                                | 461.1092 | 463.1247 | 299                      | 301 | C <sub>22</sub> H <sub>22</sub> O <sub>11</sub> (0.9)  | √ | √ [44] |
| <b>95</b> | 21.7  | Cinnamic acid                     | Di- <i>O</i> -coumaroyl tartaric acid (Isomer II) <sup>d</sup>               | 441.0824 |          | 277<br>163               |     | C <sub>22</sub> H <sub>18</sub> O <sub>10</sub> (-0.1) | √ | [15]   |
| <b>96</b> | 21.7  | Steviol<br>glycoside              | Rebaudioside- <i>O</i> -acetate <sup>f</sup>                                 | 845.3822 |          | 683<br>521<br>317        |     | C <sub>40</sub> H <sub>62</sub> O <sub>19</sub> (1.1)  | √ |        |

|     |       |                            |                                                                             |          |          |                                               |     |                                                       |   |   |                |
|-----|-------|----------------------------|-----------------------------------------------------------------------------|----------|----------|-----------------------------------------------|-----|-------------------------------------------------------|---|---|----------------|
| 97  | 22.11 | Flavone                    | Genkwanin 4'-O-glucoside <sup>d</sup>                                       | 491.1281 | 447.1295 | 445<br>283                                    | 285 | C <sub>22</sub> H <sub>22</sub> O <sub>10</sub> (2.1) | √ | √ | [59]           |
| 98  | 22.26 | Flavone                    | 5,4'-Dihydroxy 6,7-dimethoxy flavone (Cirsimaritin) <sup>e</sup>            | 313.0719 | 315.0868 | 298<br>175<br>131                             |     | C <sub>17</sub> H <sub>14</sub> O <sub>6</sub> (0.2)  | √ | √ | GNPS libraries |
| 99  | 22.33 | Flavone                    | 5,4'-Dihydroxy 6,7-dimethoxy flavone -O-glucoside (Cirsimarin) <sup>e</sup> | 475.1245 | 477.1399 | 313<br>298                                    | 315 | C <sub>23</sub> H <sub>24</sub> O <sub>11</sub> (1.5) | √ | √ | GNPS libraries |
| 100 | 22.57 | Steviol glycoside          | Rubusoside <sup>f</sup>                                                     | 641.3191 | -        | 479<br>317<br>161                             | -   | C <sub>32</sub> H <sub>50</sub> O <sub>13</sub> (0.4) | √ |   | [60]           |
| 101 | 22.9  | Flavone                    | Scutellarein <sup>a, d</sup>                                                | 285.0405 |          | 257<br>243<br>199<br>170<br>151<br>133        |     | C <sub>15</sub> H <sub>10</sub> O <sub>6</sub> (0.3)  |   | √ | [39]           |
| 102 | 24.38 | Acylglycerol               | Hydroxy linolenoyl glycerol-di-O-hexoside (Isomer I) <sup>f</sup>           | 737.3597 | -        | 415<br>367<br>293<br>235<br>183               | -   | C <sub>33</sub> H <sub>56</sub> O <sub>15</sub> (0.6) | √ | √ | [61]           |
| 103 | 24.2  | Cinnamaldehyd <sup>e</sup> | Sinapaldehyde <sup>e</sup>                                                  | 207.0663 |          | 179<br>161                                    |     | C <sub>11</sub> H <sub>12</sub> O <sub>4</sub> (0.2)  |   | √ | [62]           |
| 104 | 24.80 | Acylglycerol               | Hydroxy linolenoyl glycerol-di-O-hexoside (Isomer II) <sup>f</sup>          | 737.3609 | -        | 691<br>415<br>367<br>293<br>275<br>235<br>183 | -   | C <sub>33</sub> H <sub>56</sub> O <sub>15</sub> (0.4) | √ | √ | [61]           |

|     |       |                             |                                                                               |          |          |                                                      |            |                                                         |   |   |                   |
|-----|-------|-----------------------------|-------------------------------------------------------------------------------|----------|----------|------------------------------------------------------|------------|---------------------------------------------------------|---|---|-------------------|
| 105 | 24.9  | Flavone                     | Monohydroxytetramethoxy flavone <sup>f</sup>                                  | -        | 359.1135 | -                                                    | 344<br>315 | C <sub>19</sub> H <sub>18</sub> O <sub>7</sub> (2.8)    | √ |   | [63]              |
| 106 | 24.95 | Glycerophosphocholine lipid | Hydroxy linoleoylglycerophosphocholine (Isomer I) <sup>f</sup>                | 578.3089 |          | 518<br>293<br>275<br>223<br>183                      |            | C <sub>26</sub> H <sub>48</sub> NO <sub>8</sub> P (0.3) | √ | √ | [61]              |
| 107 | 25.09 | Acylglycerol                | Hydroxy linolenoyl glycerol di- <i>O</i> -hexoside (Isomer III) <sup>f</sup>  | 737.3603 |          | 415<br>367<br>293<br>275<br>235<br>179               |            | C <sub>33</sub> H <sub>56</sub> O <sub>15</sub> (1.1)   | √ | √ | [61]              |
| 108 | 25.38 | Flavone                     | Monohydroxy trimethoxy flavone <sup>c</sup>                                   |          | 329.1029 |                                                      | 314<br>286 | C <sub>18</sub> H <sub>16</sub> O <sub>6</sub> (3.4)    | √ |   | [13]              |
| 109 | 25.6  | Flavone                     | Apigenin <sup>d</sup>                                                         | 269.0453 | 271.0605 | 227<br>151<br>117                                    | 153        | C <sub>15</sub> H <sub>10</sub> O <sub>5</sub> (0.8)    | √ | √ | [28]              |
| 110 | 25.7  | Acylglycerol                | Dihydroxy linolenoyl glycerol di- <i>O</i> -hexoside (Isomer II) <sup>c</sup> | 753.3548 |          | 707<br>415<br>397<br>309<br>291<br>235<br>183<br>119 |            | C <sub>33</sub> H <sub>56</sub> O <sub>16</sub> (0.4)   | √ | √ | [53]              |
| 111 | 26.29 | Flavone                     | Hispidulin <sup>d,e</sup>                                                     | 299.0571 |          | 285<br>284<br>255                                    |            | C <sub>16</sub> H <sub>11</sub> O <sub>6</sub> (0.6)    |   | √ | GNPS Library [28] |
| 112 | 26.92 | Glycerophosphocholine lipid | Hydroxy-octadecadienoyl-glycerophosphocholine <sup>c</sup>                    | 580.3258 |          | 520<br>295<br>224                                    |            | C <sub>26</sub> H <sub>50</sub> NO <sub>8</sub> P (0.4) |   | √ | [61]              |

|            |       |               |                                                                                  |          |                          |                                                       |   |   |                      |
|------------|-------|---------------|----------------------------------------------------------------------------------|----------|--------------------------|-------------------------------------------------------|---|---|----------------------|
| <b>113</b> | 27.51 | Acylglycerol  | Hydroxy linolenoyl<br>glycerol- <i>O</i> -hexoside (Isomer<br>I) <sup>e</sup>    | 575.3080 | 293<br>275<br>253<br>171 | C <sub>27</sub> H <sub>46</sub> O <sub>10</sub> (0.0) | √ | √ | [64]                 |
| <b>114</b> | 27.81 | Acylglycerol  | Hydroxy linolenoyl<br>glycerol- <i>O</i> -hexoside (Isomer<br>II) <sup>e</sup>   | 529.3013 | 293<br>275<br>253<br>171 | C <sub>27</sub> H <sub>46</sub> O <sub>10</sub> (1.0) | √ | √ | [64]                 |
| <b>115</b> | 27.89 | Cinnamic acid | Coumaric acid ethyl ester <sup>d</sup>                                           | 191.0716 | 163<br>145<br>119        | C <sub>11</sub> H <sub>12</sub> O <sub>3</sub> (1.0)  | √ | √ | [65]                 |
| <b>116</b> | 28.0  | Fatty acid    | Trihydroxy octadecenoic acid<br>(Isomer II) <sup>e</sup>                         | 329.2333 | 311<br>201               | C <sub>18</sub> H <sub>34</sub> O <sub>5</sub> (0.0)  |   | √ | [53]                 |
| <b>117</b> | 28.2  | Coumarin      | Dihydrodihydroxy-methyl-<br>isocoumarin <sup>e</sup>                             | 195.0657 | 167<br>152<br>124        | C <sub>10</sub> H <sub>10</sub> O <sub>4</sub> (3.1)  | √ |   | [66]                 |
| <b>118</b> | 28.32 | Acylglycerol  | Dihydroxy linolenoyl<br>glycerol- <i>O</i> -hexoside (Isomer<br>II) <sup>e</sup> | 545.2972 | 293<br>291<br>275<br>253 | C <sub>27</sub> H <sub>46</sub> O <sub>11</sub> (0.8) | √ | √ | [64]                 |
| <b>119</b> | 28.49 | Flavone       | Chrysoeriol <sup>b</sup>                                                         | 299.056  | 285<br>284<br>183        | C <sub>16</sub> H <sub>12</sub> O <sub>6</sub> (0.16) | √ | √ | GNPS library<br>[67] |
| <b>120</b> | 28.95 | Fatty acid    | Dihydroxy-tetradecanoic acid<br><sup>e</sup>                                     | 259.1916 | 213<br>141               | C <sub>14</sub> H <sub>28</sub> O <sub>4</sub> (-0.6) |   | √ | [68]                 |
| <b>121</b> | 31.03 | Fatty acid    | Trihydroxy octadecenoic acid<br>(Isomer III) <sup>e</sup>                        | 329.2332 | 311<br>199               | C <sub>18</sub> H <sub>34</sub> O <sub>5</sub> (-0.1) |   | √ | [53]                 |

|     |       |                            |                                                                          |          |                                               |                                                        |   |   |                      |
|-----|-------|----------------------------|--------------------------------------------------------------------------|----------|-----------------------------------------------|--------------------------------------------------------|---|---|----------------------|
| 122 | 31.15 | Acylglycerol               | Octadecatrienoyl glycerol- <i>O</i> -<br>dihexoside <sup>e</sup>         | 721.3655 | 415<br>397<br>277<br>235<br>179<br>119        | C <sub>34</sub> H <sub>58</sub> O <sub>16</sub> (0.4)  | √ | √ | GNPS library<br>[69] |
| 123 | 31.16 | Acylglycerol               | Linolenoyl-glycerol<br>(Isomer I) <sup>e</sup>                           | 353.2694 | 261                                           | C <sub>21</sub> H <sub>36</sub> O <sub>4</sub> (2.4)   | √ |   | [70]                 |
| 124 | 31.86 | Flavone                    | Genkwanin (Apigenin 7-<br>methyl ether) <sup>b,d</sup>                   | 283.0608 | 269<br>268                                    | C <sub>16</sub> H <sub>12</sub> O <sub>5</sub> (1.35)  | √ | √ | GNPS library<br>[50] |
| 125 | 32.59 | Flavone                    | Dihydroxy dimethoxy<br>flavone                                           | 313.0719 | 298<br>283<br>269<br>255                      | C <sub>17</sub> H <sub>14</sub> O <sub>6</sub> (0.2)   | √ | √ | [71]                 |
| 126 | 32.9  | Glycerophospha<br>te lipid | Hydroxy-octadecatrienoyl<br>glycerophosphate (Isomer I) <sup>e</sup>     | 475.2470 | 293<br>275<br>235<br>181<br>153<br>125        | C <sub>21</sub> H <sub>35</sub> O <sub>7</sub> P (0.4) | √ | √ | [64]                 |
| 127 | 33.6  | Glycerophospha<br>te lipid | Hydroxy-octadecatrienoyl<br>glycerophosphate (Isomer II)<br><sup>e</sup> | 475.2468 | 293<br>275<br>235<br>199<br>181<br>153<br>125 | C <sub>21</sub> H <sub>35</sub> O <sub>7</sub> P (0.3) | √ | √ | [64]                 |
| 128 | 33.75 | Fatty acid                 | Palmitic-oleic dimer<br>hexoside (Isomer I) <sup>e</sup>                 | 699.3811 | 415<br>397<br>287<br>235<br>179<br>119        | C <sub>32</sub> H <sub>60</sub> O <sub>16</sub> (0.7)  | √ | √ | [69]                 |



|     |       |                             |                                                                                  |          |          |                                        |            |                                                         |   |   |                    |
|-----|-------|-----------------------------|----------------------------------------------------------------------------------|----------|----------|----------------------------------------|------------|---------------------------------------------------------|---|---|--------------------|
| 129 | 34.62 | Glycerophosphocholine lipid | Octadecadienoyl-sn-glycero-phosphocholine <sup>e</sup>                           | 564.3308 | 520.337  | 504<br>279<br>242<br>224<br>183        | 184        | C <sub>26</sub> H <sub>50</sub> NO <sub>7</sub> P (0.2) | √ | √ | GNPS library, [53] |
| 130 | 34.72 | Fatty acid                  | Palmitic-oleic dimer hexoside (Isomer II) <sup>e</sup>                           | 699.3815 |          | 415<br>397<br>287<br>235<br>179<br>119 |            | C <sub>32</sub> H <sub>60</sub> O <sub>16</sub> (0.9)   | √ | √ | [69]               |
| 131 | 34.95 | Glycerophosphate lipid      | Linolenoyl glycerophosphate <sup>e</sup>                                         | 459.2519 |          | 277<br>181<br>153                      |            | C <sub>21</sub> H <sub>35</sub> O <sub>6</sub> P (0.4)  | √ | √ | [64]               |
| 132 | 35.08 | Glycerophosphate lipid      | Nonadecatrienoyl-glycerophosphate <sup>e</sup>                                   | 491.2411 |          | 445<br>291<br>263<br>223<br>181<br>153 |            | C <sub>22</sub> H <sub>39</sub> O <sub>7</sub> P(0.4)   | √ | √ | [64]               |
| 133 | 35.4  | Acylglycerol                | Linolenoyl-glycerol (Isomer II) <sup>e</sup>                                     | -        | 353.2694 | -                                      | 261        | C <sub>21</sub> H <sub>36</sub> O <sub>4</sub> (2.6)    | √ |   | [70]               |
| 134 | 35.52 | Acylglycerol                | Octadecatrienoyl glycerol- <i>O</i> -hexoside <sup>e</sup>                       | 559.3127 |          | 351<br>277<br>253                      |            | C <sub>28</sub> H <sub>48</sub> O <sub>11</sub> (0.5)   | √ | √ | GNPS library       |
| 135 | 36.06 | Glycerophosphate lipid      | Hydroxy-octadecadienoyl glycerophosphate (Isomer I) <sup>e</sup>                 | 477.2624 |          | 295<br>277<br>183<br>153               |            | C <sub>21</sub> H <sub>37</sub> O <sub>7</sub> P (0.2)  | √ | √ | [64]               |
| 136 | 36.44 | Glycerophosphocholine lipid | Hexadecanoyl-glycero-phosphocholine=Palmitoyl-glycerophosphocholine <sup>e</sup> | 540.3306 | 496.3401 | 480<br>255<br>224<br>183               | 313<br>184 | C <sub>24</sub> H <sub>50</sub> NO <sub>7</sub> P (0.2) | √ | √ | [53]               |

|     |       |                                                                |                                                                    |          |                                        |                                                        |   |   |                   |
|-----|-------|----------------------------------------------------------------|--------------------------------------------------------------------|----------|----------------------------------------|--------------------------------------------------------|---|---|-------------------|
| 137 | 36.54 | Fatty acid                                                     | Hydroxy-octadecatrienoic acid (Isomer I) <sup>e</sup>              | 293.2123 | 275<br>223<br>183<br>171<br>155        | C <sub>18</sub> H <sub>30</sub> O <sub>3</sub> (0.1)   | √ | √ | [72, 73]          |
| 138 | 36.68 | Glycerophosphate lipid                                         | Hydroxy-octadecadienoyl glycerophosphate (Isomer II) <sup>e</sup>  | 477.2630 | 295<br>277<br>195<br>181<br>153        | C <sub>21</sub> H <sub>37</sub> O <sub>7</sub> P (1.5) | √ | √ | [64]              |
| 139 | 36.74 | Fatty acid                                                     | Hydroxy-octadecatrienoic acid (Isomer II) <sup>e</sup>             | 293.2143 | 275<br>223<br>183<br>171<br>155        | C <sub>18</sub> H <sub>30</sub> O <sub>3</sub> (1.3)   | √ | √ | [72]              |
| 140 | 37.05 | Fatty acid                                                     | Hydroxy-octadecatrienoic acid (Isomer III) <sup>e</sup>            | 293.2119 | 275<br>223<br>205<br>195               | C <sub>18</sub> H <sub>30</sub> O <sub>3</sub> (0.2)   | √ | √ | [72]              |
| 141 | 37.46 | Glycerophosphate lipid                                         | Hydroxy-octadecadienoyl glycerophosphate (Isomer III) <sup>e</sup> | 477.2620 | 295<br>277<br>199<br>181<br>153        | C <sub>21</sub> H <sub>37</sub> O <sub>7</sub> P (0.4) | √ | √ | [64]              |
| 142 | 38.29 | Lysophosphatidylglycerols (Acyl-glycerophosphoglycerol lipids) | Heptadecadienoyl-glycerophosphoglycerol (Isomer I) <sup>e</sup>    | 493.2576 | 363<br>293<br>245<br>181<br>153        | C <sub>23</sub> H <sub>43</sub> O <sub>9</sub> P (0.9) | √ | √ | [64]              |
| 143 | 38.91 | Fatty acid                                                     | Hydroxyoctadecadienoic acid <sup>e</sup> (Dimorphecolic acid)      | 295.2280 | 279<br>277<br>259<br>195<br>183<br>171 | C <sub>18</sub> H <sub>32</sub> O <sub>3</sub> (-0.4)  | √ | √ | GNPS library [53] |

|            |       |                                                                    |                                                                   |          |                          |                                                        |   |   |      |
|------------|-------|--------------------------------------------------------------------|-------------------------------------------------------------------|----------|--------------------------|--------------------------------------------------------|---|---|------|
|            |       |                                                                    |                                                                   |          | 155                      |                                                        |   |   |      |
| <b>144</b> | 39.31 | Lysophosphatidylglycerols<br>(Acyl-glycero-phosphoglycerol lipids) | Heptadecadienoyl-glycero-phosphoglycerol (Isomer II) <sup>c</sup> | 493.2576 | 293<br>245<br>181<br>153 | C <sub>23</sub> H <sub>43</sub> O <sub>9</sub> P (0.9) | √ | √ | [64] |

<sup>a</sup> Flavonoid aglycones isolated in the present study

<sup>b</sup> Compounds previously isolated from *Hs*

<sup>c</sup> Compounds previously isolated from *Th*

<sup>d</sup> Compounds previously reported in other seagrasses

<sup>e</sup> Compounds detected for the first time from the studied species

<sup>f</sup> Compounds not previously reported in nature

**Table S3:** Results of enzymes inhibition assays of *Hs* and *Th* extracts

|                   | <b><math>\alpha</math>-amylase inhibition assay</b> |                                | <b><math>\beta</math>- glucosidase inhibition assay</b> |                                | <b>pancreatic lipase inhibition assay</b> |                                |
|-------------------|-----------------------------------------------------|--------------------------------|---------------------------------------------------------|--------------------------------|-------------------------------------------|--------------------------------|
|                   | % of inhibition at 600 $\mu$ g/ml                   | IC <sub>50</sub> ( $\mu$ g/ml) | % of inhibition at 300 $\mu$ g/ml                       | IC <sub>50</sub> ( $\mu$ g/ml) | % of inhibition at 100 $\mu$ g/ml         | IC <sub>50</sub> ( $\mu$ g/ml) |
| <i>Hs</i> extract | 87.5 $\pm$ 5.9                                      | 250.62 $\pm$ 8.2               | 48 $\pm$ 4.5                                            | 380 $\pm$ 3.5                  | 94.7 $\pm$ 6.1                            | 23.05 $\pm$ 3.5                |
| <i>Th</i> extract | 92.9 $\pm$ 6.8                                      | 230.28 $\pm$ 8.5               | 52.5 $\pm$ 4.8                                          | 332.5 $\pm$ 3.4                | 94.8 $\pm$ 5.4                            | 23.7 $\pm$ 3.2                 |
| Acarbose          | 91.1 $\pm$ 7.2                                      | 230.85 $\pm$ 2.45              | 62.1 $\pm$ 7.2                                          | 250.76 $\pm$ 1.23              |                                           | 28.96 $\pm$ 6.4                |
| Orlistat          |                                                     |                                |                                                         |                                | 92 $\pm$ 6.4                              | 28.96 $\pm$ 6.4                |

**Table S4:** Summary of the biomarkers in different study groups of diabetic rats

|                                   | <b>D</b>         | <b>G</b>       | <b><i>Th</i> 100</b>                | <b><i>Th</i> 200</b>                | <b><i>Hs</i> 100</b>               | <b><i>Hs</i> 200</b>               |
|-----------------------------------|------------------|----------------|-------------------------------------|-------------------------------------|------------------------------------|------------------------------------|
| <b>Glucose (mg/dl)</b>            | 379.8 $\pm$ 30.5 | 88.0 $\pm$ 6.4 | 196.7 $\pm$ 10.3 <sup>a,b,d,e</sup> | 181.7 $\pm$ 10.3 <sup>a,b,c,f</sup> | 119.3 $\pm$ 3.1 <sup>a,b,c,f</sup> | 101.0 $\pm$ 3.0 <sup>a,b,d,e</sup> |
| <b>Insulin (mIU/ml)</b>           | 1.3 $\pm$ 0.2    | 5.2 $\pm$ 0.6  | 1.8 $\pm$ 0.1 <sup>a,b,e</sup>      | 1.9 $\pm$ 0.2 <sup>a,b,f</sup>      | 6.0 $\pm$ 0.2 <sup>a,b,c,f</sup>   | 6.7 $\pm$ 0.3 <sup>a,b,d,e</sup>   |
| <b>GLUT2 (ng/g tissue)</b>        | 2.5 $\pm$ 0.4    | 26.4 $\pm$ 2.4 | 6.9 $\pm$ 0.8 <sup>a,b,d,e</sup>    | 11.7 $\pm$ 0.9 <sup>a,b,c,f</sup>   | 14.5 $\pm$ 1.0 <sup>a,b,c,f</sup>  | 22.6 $\pm$ 1.0 <sup>a,b,d,e</sup>  |
| <b>NO (<math>\mu</math>mol/l)</b> | 2.9 $\pm$ 0.2    | 51.0 $\pm$ 5.3 | 8.1 $\pm$ 0.5 <sup>a,b,d,e</sup>    | 8.9 $\pm$ 0.4 <sup>a,b,c,f</sup>    | 26.7 $\pm$ 2.2 <sup>a,b,c,f</sup>  | 36.6 $\pm$ 2.3 <sup>a,b,d,e</sup>  |
| <b>MDA (ng/g tissue)</b>          | 25.2 $\pm$ 1.5   | 2.5 $\pm$ 0.3  | 12.3 $\pm$ 0.4 <sup>a,b,d,e</sup>   | 9.8 $\pm$ 1.1 <sup>a,b,c,f</sup>    | 4.0 $\pm$ 0.2 <sup>a,b,c,f</sup>   | 3.4 $\pm$ 0.2 <sup>a,b,d,e</sup>   |
| <b>Total Cholesterol (mg/dl)</b>  | 125.8 $\pm$ 7.0  | 35.0 $\pm$ 1.8 | 83.0 $\pm$ 3.8 <sup>a,b,d,e</sup>   | 72.8 $\pm$ 5.5 <sup>a,b,c,f</sup>   | 39.2 $\pm$ 1.2 <sup>a,b,c,f</sup>  | 37.3 $\pm$ 1.0 <sup>a,b,d,e</sup>  |
| <b>HDL-Cholesterol (mg/dl)</b>    | 19.5 $\pm$ 1.4   | 36.0 $\pm$ 0.9 | 22.8 $\pm$ 0.8 <sup>a,b,d,e</sup>   | 23.3 $\pm$ 0.8 <sup>a,b,c,f</sup>   | 31.2 $\pm$ 1.2 <sup>a,b,c,f</sup>  | 33.0 $\pm$ 0.9 <sup>a,b,d,e</sup>  |
| <b>Triglycerides (mg/dl)</b>      | 137.7 $\pm$ 7.3  | 37.3 $\pm$ 1.9 | 89.3 $\pm$ 3.1 <sup>a,b,d,e</sup>   | 85.7 $\pm$ 3.3 <sup>a,b,c,f</sup>   | 45.5 $\pm$ 2.9 <sup>a,b,c,f</sup>  | 39.0 $\pm$ 0.9 <sup>a,b,d,e</sup>  |

D: Diabetic control, G: Glibenclamide 6.5 mg kg<sup>-1</sup>/day, *Th*100: *Th* 100 mg kg<sup>-1</sup>/day, *Th* 200: *Th* 200 mg kg<sup>-1</sup>/day, *Hs* 100: *Hs*100 mg kg<sup>-1</sup>/day, *Hs* 200: *Hs* 200 mg kg<sup>-1</sup>/day.

Results are expressed as mean  $\pm$  SD

a: Significant difference from diabetic control, b: Significant difference from glibenclamide group, c: Significant difference from *Th* 100 mg kg<sup>-1</sup> / day group, d: Significant difference from *Th* 200 mg kg<sup>-1</sup> / day group, e: Significant difference from *Hs* 100 mg kg<sup>-1</sup> / day, f: Significant difference from *Hs* 200 mg kg<sup>-1</sup> / day.

## Supplementary Figures

**Fig. S1.** HPLC profile of the *Halophila stipulaceae* (Hs) extract detected at wavelengths 210, 250, 285, 375 nm.

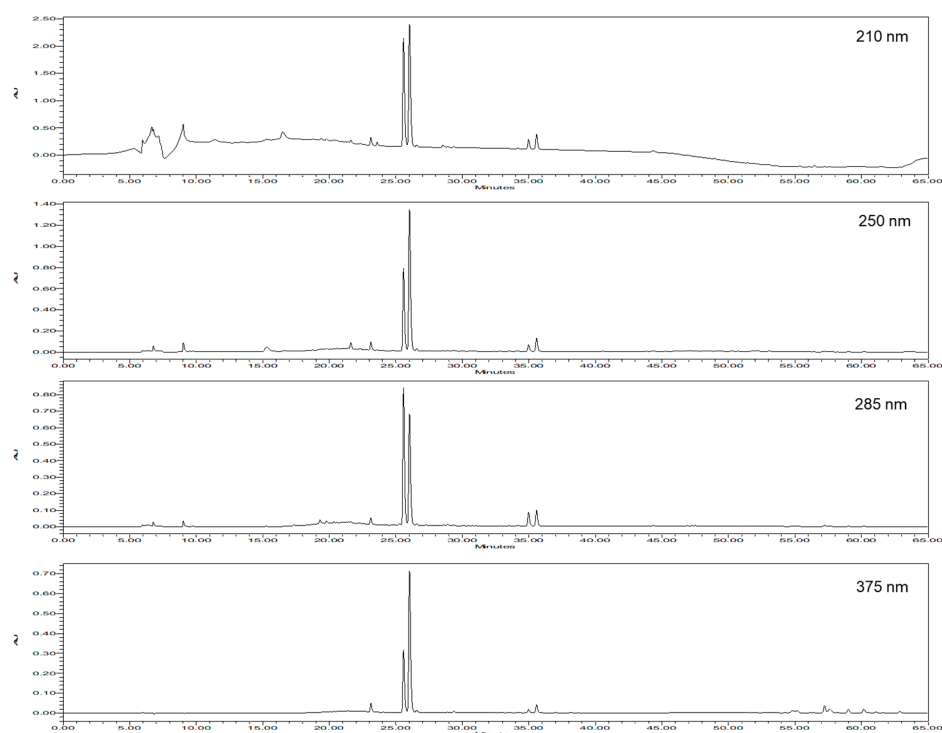

**Fig. S2.** HPLC profile of *Thalassia hempricii* (Th) extract detected at wavelengths 210, 250, 285, 375 nm.

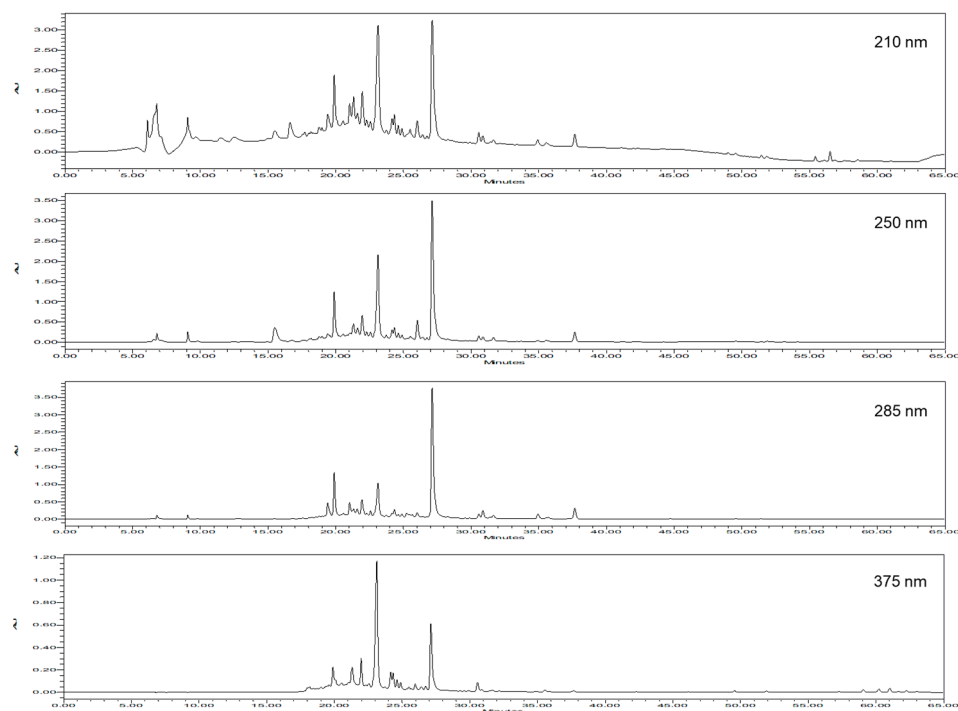

**Fig. S3.** The base peak chromatograms (BPC) of *Halophila stipulaceae* extract (blue) and *Thalassia hemprichii* extract (yellow) in the negative ionization mode.

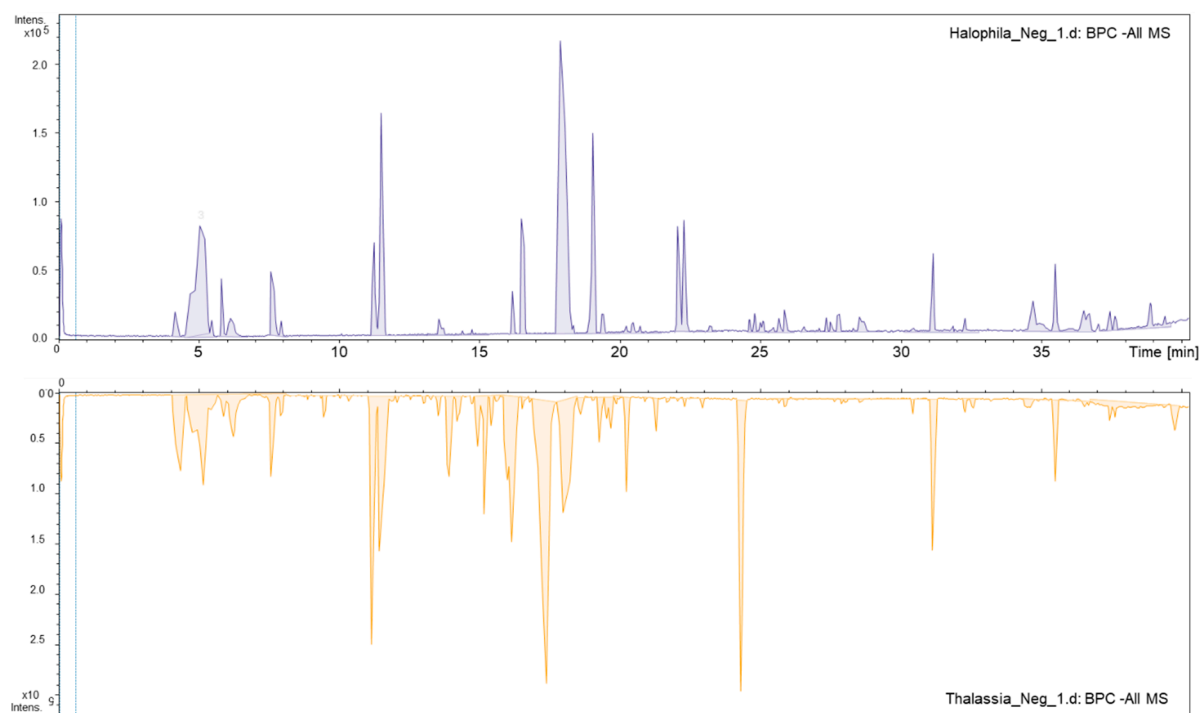

**Fig. S4.** The base peak chromatograms (BPC) of *Halophila stipulaceae* extract (blue) and *Thalassia hemprichii* extract (yellow) in the positive ionization mode.

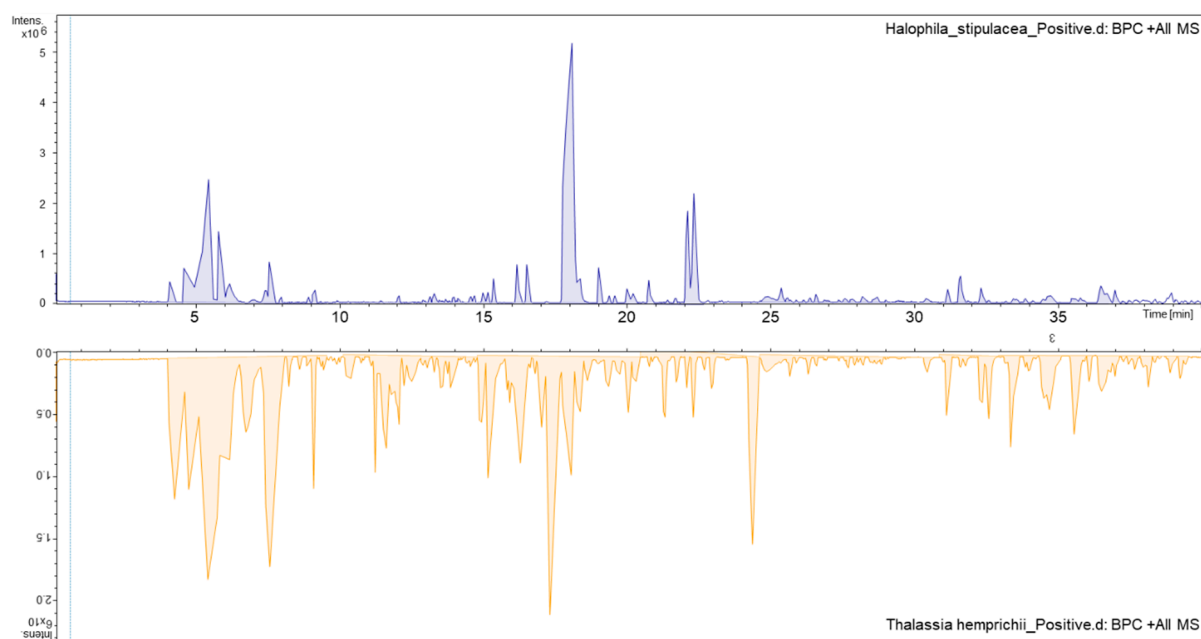

**Fig. S5.** Enlarged positive molecular network created using MS/MS data (positive mode) from *Halophila stipulaceae* (Hs) (purple nodes) and *Thalassia hemphiricii* (Th) (yellow nodes). The network is displayed as a pie chart to reflect the relative abundance of each ion in both extracts. Black color corresponds to the solvent used as a blank. Red dashed arrows indicate fragmentation pathways. Regions A and B are highlighted with red boxes.

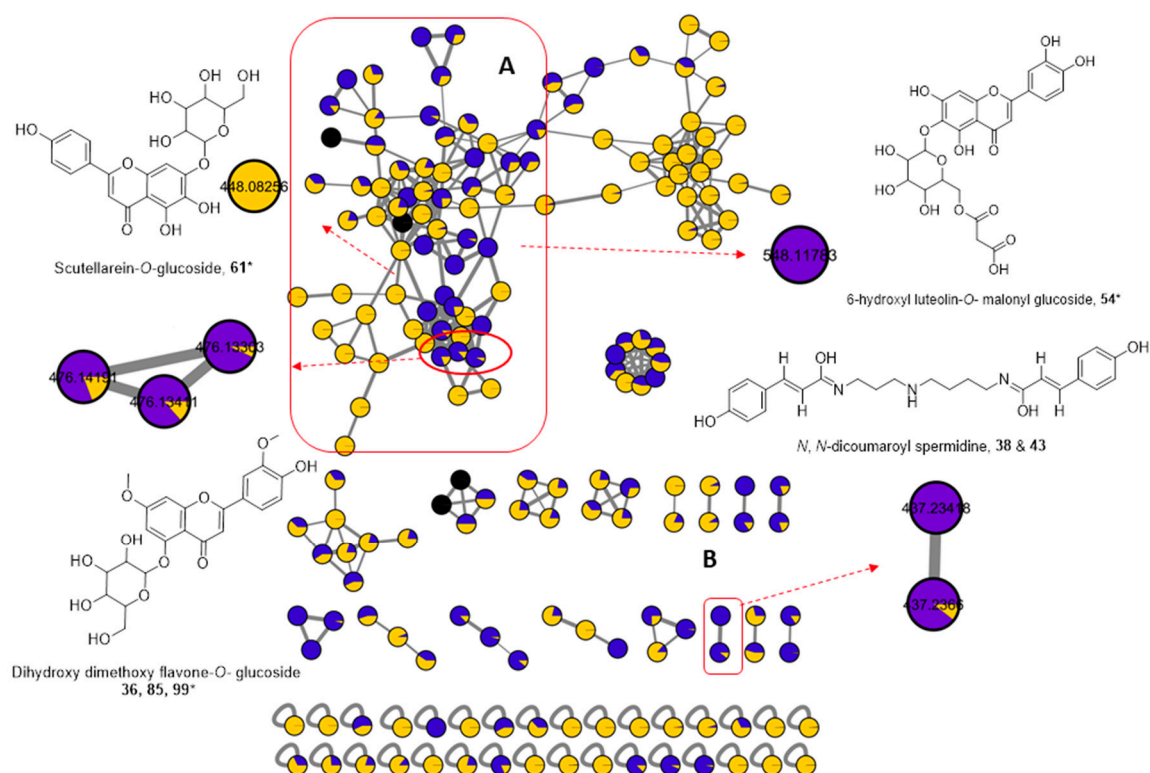

**Fig. S6.** Proposed fragmentation scheme and MS<sup>2</sup> spectrum of methoxy benzoic acid -*O*-sulphate, **16**.

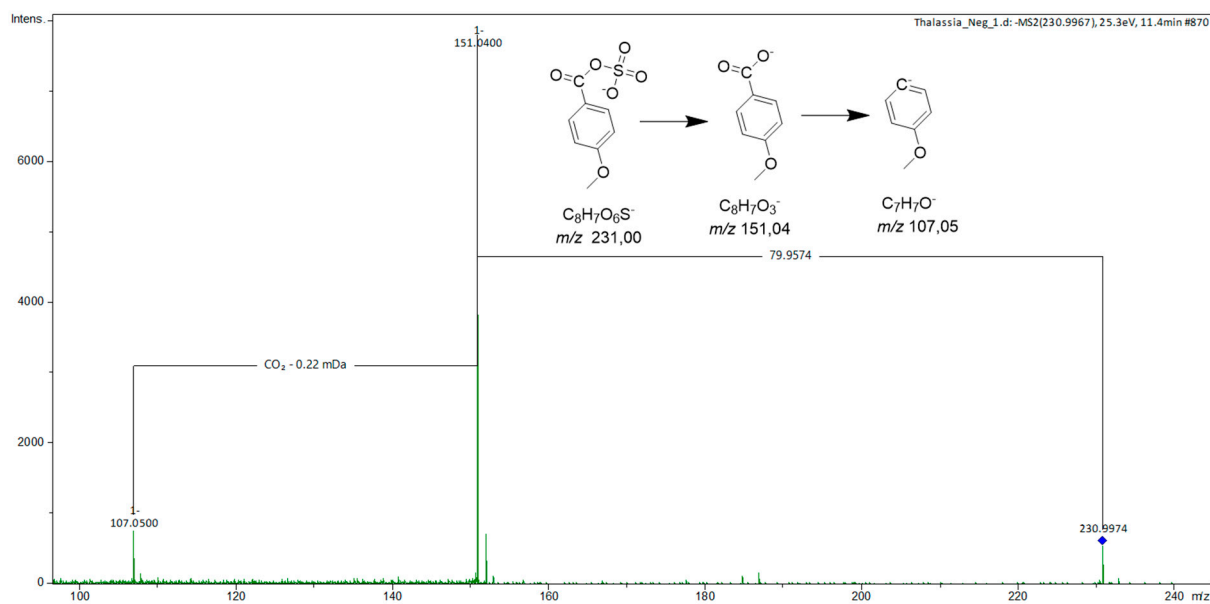

**Fig. S7.** Proposed fragmentation scheme and MS<sup>2</sup> spectrum of dimethoxy benzoic acid-*O*-sulphate, **30**.

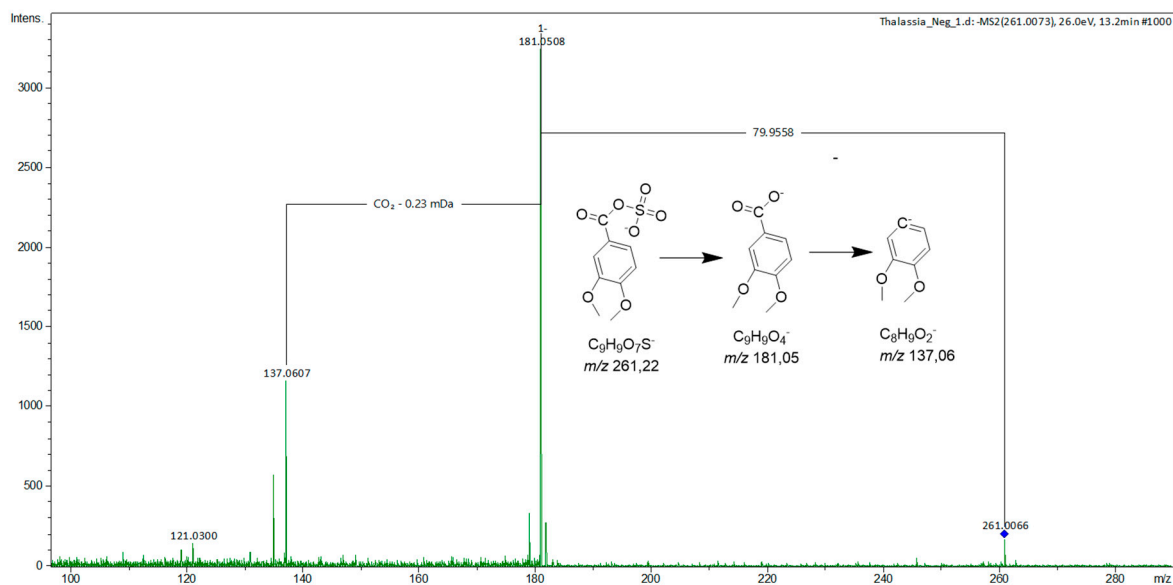



**Fig. S8.** Proposed fragmentation scheme and MS<sup>2</sup> spectrum of *O*-caffeoyl *O*-hydroxydimethoxybenzoyl tartaric acid, **26**.

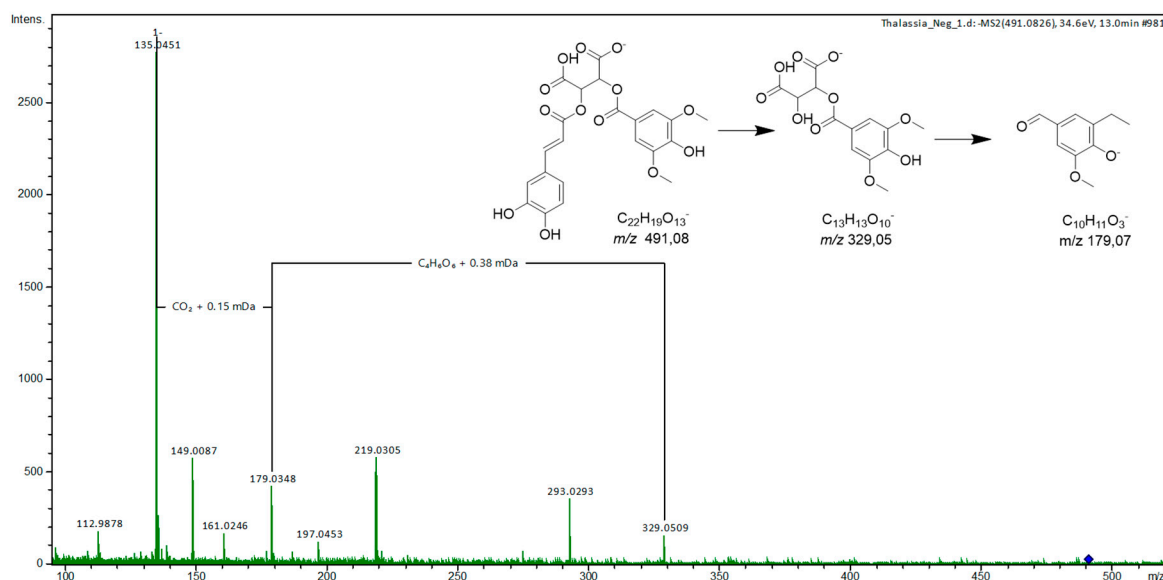

**Fig. S9.** Proposed fragmentation scheme and MS<sup>2</sup> spectrum of methoxypentahydroxyflavanone-*O*-hexoside, **28**.

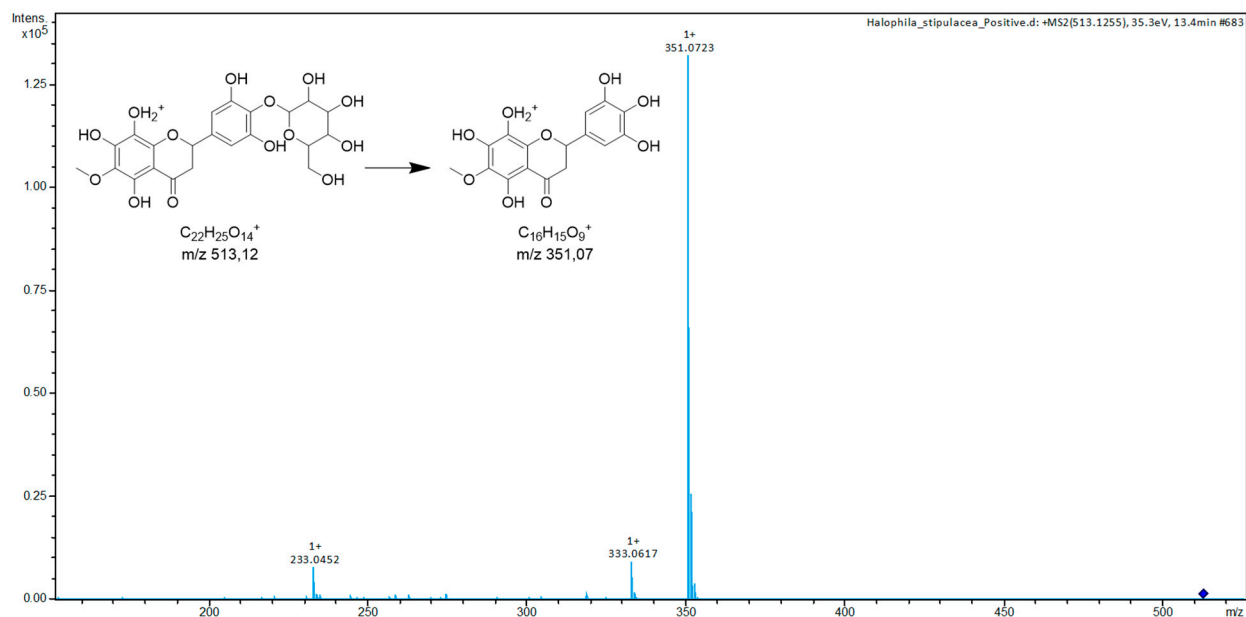

**Fig. S10.** Proposed fragmentation scheme and MS<sup>2</sup> spectra of acetylated rebaudioside, **96** (Upper) vs. its non-acetylated ascendant, rebaudioside; **72** (Bottom)

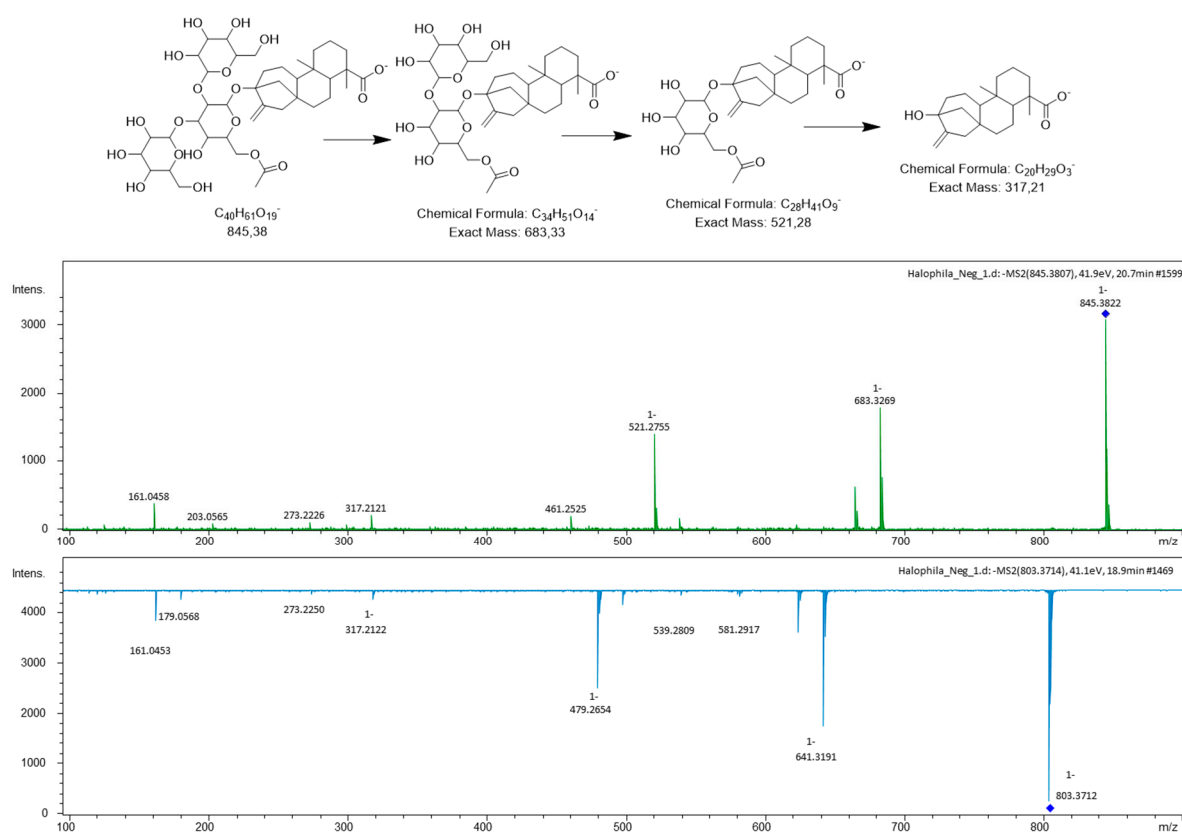

**Fig. S11.** EIC of syphonoside, **53** in both extracts (Upper: *Hs*; Bottom: *Th*)

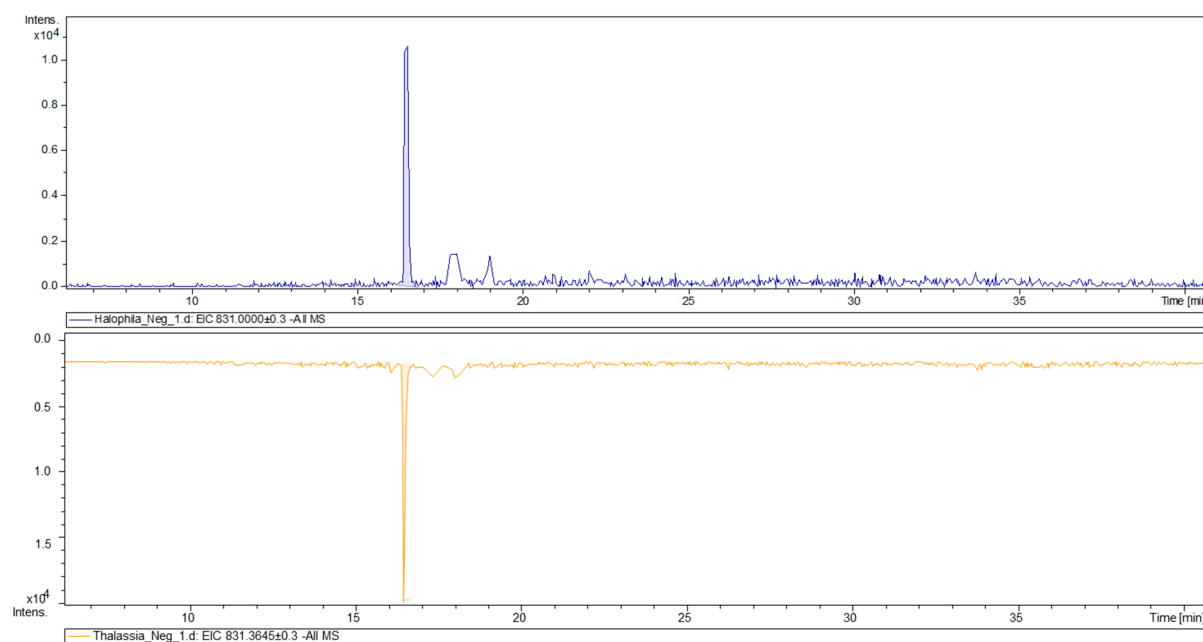

**Fig. S12.** Proposed fragmentation scheme and MS<sup>2</sup> spectrum of syphonoside, **53** in both extracts

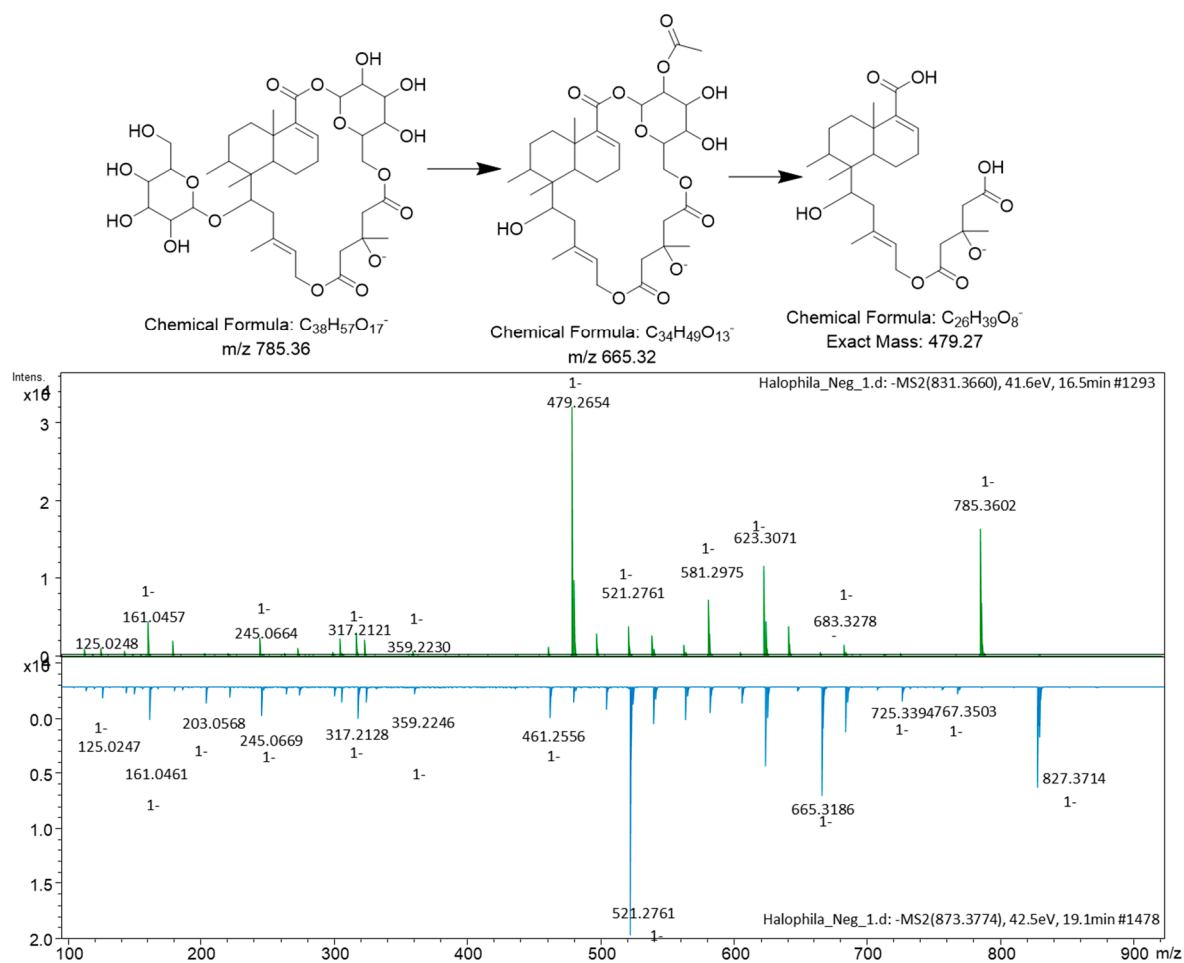

## Results and Discussion

### Compounds annotation

#### Lipids

Despite an early comparative study of 7 seagrasses (including *Th* and other *Halophila* species) described the occurrence of 30 saturated and unsaturated fatty acids with  $C_{12}$ – $C_{30}$  chain length [74], no detailed reports ever since discussed the lipid profile of these two marine seagrasses. Comprehensively, cluster **A** in the negative MN (**Fig. 1**) unearthed a fertile lipid family with an array of different classes not previously described in these two genera.

#### Fatty acids

Eleven fatty acids were deconvoluted according to their molecular formula, fragmentation pattern, and the literature data reported by [53, 61, 69]. The negative MN *via* the GNPS2 platform allowed for the discrimination of the isomeric fatty acids besides proposing some hits from NIST as a rich lipid spectral library which were manually verified (Supplementary Table S2). For instance, two glycosylated fatty acid dimers, seen at Rt 33.75 & 34.72 min, were characterized as isomers of palmitic-oleic dimer hexoside; **128** & **130** ( $m/z$  699.3811 [M-H]<sup>-</sup>, C<sub>32</sub>H<sub>60</sub>O<sub>16</sub>). Not only were glycosylated fatty acid deciphered but also hydroxylated fatty acids including dihydroxy-tetradecanoic acids; **120** ( $m/z$  259.1916 [M-H]<sup>-</sup>, C<sub>14</sub>H<sub>28</sub>O<sub>4</sub>), isomers of trihydroxy octadecenoic acid; **87**, **117** & **122** ( $m/z$  721.3655 [M-H]<sup>-</sup>, C<sub>34</sub>H<sub>58</sub>O<sub>16</sub>), and hydroxy-octadecatrienoic acid; **137**, **139** & **140** ( $m/z$  293.2123 [M-H]<sup>-</sup>, C<sub>18</sub>H<sub>30</sub>O<sub>3</sub>) were tethered. Moreover, aminooctanedioic acid; **7** ( $m/z$  188.0930 [M-H]<sup>-</sup>, C<sub>8</sub>H<sub>15</sub>NO<sub>4</sub>) was also characterized.

### 3.3.3.2. Acylglycerols (Glycerides)

Acylglycerols shaped the second class belonging to the lipids family, where the fatty acid moiety is esterified with glycerol through one of its hydroxyl groups. Thirteen acylglycerols were detected in the present study chiefly as mono-glycerides (Supplementary Table S2). Annotated mono-glycerides included isomers of linolenoyl-glycerol; **123** & **133** ( $m/z$  353.2694 [M+H]<sup>+</sup>, C<sub>21</sub>H<sub>36</sub>O<sub>4</sub>). While mono glycosylated acylglycerols were detected at **90** ( $m/z$  591.3027 [M+CH<sub>2</sub>O<sub>2</sub>-H]<sup>-</sup>, C<sub>27</sub>H<sub>46</sub>O<sub>11</sub>) & **118** ( $m/z$  545.2972 [M-H]<sup>-</sup>, C<sub>27</sub>H<sub>46</sub>O<sub>11</sub>), annotated as dihydroxy linolenoyl glycerol *O*-hexoside. Besides, hydroxy linolenoyl glycerol *O*- hexoside at **113** & **114** ( $m/z$  575.3080 [M +CH<sub>2</sub>O<sub>2</sub>-H]<sup>-</sup>, C<sub>27</sub>H<sub>46</sub>O<sub>10</sub>), and octadecatrienoyl glycerol *O*- hexoside **134** ( $m/z$  559.3127 [M +CH<sub>2</sub>O<sub>2</sub>-H]<sup>-</sup>, C<sub>28</sub>H<sub>48</sub>O<sub>11</sub>).

Likewise, acylglycerols di-*O*- hexosides were described as dihydroxy linolenoyl glycerol di-*O*-hexoside; **77** & **110** ( $m/z$  753.3548 [M +CH<sub>2</sub>O<sub>2</sub>-H]<sup>-</sup>, C<sub>33</sub>H<sub>56</sub>O<sub>16</sub>), hydroxy linolenoyl glycerol di-*O*- hexoside; **102**, **104** & **107** ( $m/z$  737.3597 [M +CH<sub>2</sub>O<sub>2</sub>-H]<sup>-</sup>, C<sub>33</sub>H<sub>56</sub>O<sub>15</sub>), and

octadecatrienoyl glycerol di-*O*- hexoside; **122** ( $m/z$  721.3655  $[M-H]^-$ ,  $C_{34}H_{58}O_{16}$ ). Monogalactosyldiacylglyceride and digalactosyl- diacylglycerol were noticed previously in the seagrasses of Japan [75].

### *Phospholipids*

Within the same lipidomic space, phosphorylated lipids were also recognized in the form of phosphocholines, glycerophosphates, and lysophosphatidylglycerols agreeing with [75] who highlighted the presence of such chemistries in the seagrasses. Interestingly, phospholipids were recounted to play a role in thermo-adaptation of the marine seagrass, *Zostera marina* [76].

### *Phosphocholines*

Phosphocholines are phospholipids esterified with a choline moiety and are the structural elements of the biological membranes. The detected phosphocholine lipids were characterized by the molecular formula of  $NO_7P$ , and  $NO_8P$  heteroatom composition dependable of a phospholipid structure in which only one of the sn-1/sn-2 positions of the glycerol moiety is acylated with fatty acid and the nitrogenated head group corresponds to choline [53].

Detected phosphocholines were marked by their molecular anions  $[M+CH_2O_2-H]^-$  as formic acid adducts aligning with the previous findings by [64], and yielding a main product ion  $[M-15]^-$ , conferring to the characteristic performance of phosphocholine lipid. Additionally, the detection of a product ion at  $m/z$  183 correlates to the phosphocholine unit, which suggests these compounds to be lyso-phosphatidylcholine (Supplementary Table S2). Accordingly, detected phospholipids were annotated as octadecadienoyl-sn-glycerophosphocholine; **129** ( $m/z$  564.3308  $[M+CH_2O_2-H]^-$ ,  $C_{26}H_{50}NO_7P$ ), hydroxylinoleoyl glycerophosphocholine; **106** ( $m/z$  578.3089  $[M+CH_2O_2-H]^-$ ,  $C_{26}H_{48}NO_8P$ ), hydroxyl octadecadienoyl

glycerophosphocholine; **112** ( $m/z$  580.3258  $[M+CH_2O_2-H]^-$ ,  $C_{26}H_{50}NO_8P$ ), and hexadecanoyl glycerophosphocholine; **136** ( $m/z$  540.3306  $[M+CH_2O_2-H]^-$ ,  $C_{24}H_{50}NO_7P$ ).

#### *Glycerophosphate lipids*

Furthermore, another phospholipid class was encountered as glycerophosphate lipids which were distinguished by the neural loss of a dehydrated phosphoglycerol unit (-136 Da), and supported by the presence of the product ion at  $m/z$  153 (Supplementary Table S2). This to include, isomers of hydroxy-octadecatrienoyl glycerophosphate; **126 & 127** ( $m/z$  475.2470  $[M+CH_2O_2-H]^-$ ,  $C_{21}H_{35}O_7P$ ), and hydroxyoctadecadienoyl glycerophosphate; ( $m/z$  477.2624  $[M+CH_2O_2-H]^-$ ,  $C_{21}H_{37}O_7P$ ) **136, 138 & 141**. Analogously, linolenoyl and nonadecatrienoyl derivatives of glycerophosphate were detected at **133** ( $m/z$  459.2519  $[M+CH_2O_2-H]^-$ ,  $C_{21}H_{35}O_6P$ ) & **132** ( $m/z$  491.2411  $[M+CH_2O_2-H]^-$ ,  $C_{22}H_{39}O_7P$ ), correspondingly.

#### *Lysophosphatidylglycerols (Acyl-glycero-phosphoglycerol lipids)*

In addition to the phospholipids and acylphospholipids, lysophosphatidylglycerols were the last defined class of lipids as glycerophosphoglycerol in which the glycerol moiety is attached to a phosphate group linked to a fatty acid acylglycerol. The detected lysophosphatidylglycerols were exemplified by 2 isomers of heptadecadienoyl-glycerophosphoglycerol; **142 & 144** ( $m/z$  493.2576  $[M-H]^-$ ,  $C_{23}H_{43}O_9P$ ) as confirmed by product ions at  $m/z$  153 and 245 corresponding to mono-dehydrated glycerophosphate and glycerophosphoglycerol, respectively (Supplementary Table S2).

#### *3.3.6. Miscellaneous*

Two coumarins were assigned as dihydrodihydroxy-methyl-isocoumarin; **41** ( $m/z$  177.0193  $[M-H]^-$ ,  $C_9H_6O_4$ ) in *Th* and esculetin (6,7-dihydroxycoumarin); **117** ( $m/z$  195.0657  $[M+H]^+$ ,  $C_{10}H_{10}O_4$ ) in *HS*. Differently, a characteristic lignan was attained in *HS* as a scattered node, **65** ( $m/z$  889.1082  $[M+H]^+$ ,  $C_{43}H_{36}O_{21}$ ) with its  $MS^2$  agreeing with that of trilobatin E [46].

## References

1. Marzouk, M.M., et al., *Phenolics from Tanacetum sinaicum (Fresen.) Delile ex Bremer & Humphries (Asteraceae)*. Biochemical Systematics and Ecology, 2016. **65**: p. 143-146.
2. Kassem, M.E., et al., *A sulphated flavone glycoside from Livistona australis and its antioxidant and cytotoxic activity*. Natural product research, 2012. **26**(15): p. 1381-1387.
3. Farid, M.M., et al., *Isoscutellarein 8, 4'-Dimethyl ether glycosides as cytotoxic agents and chemotaxonomic markers in Kickxia aegyptiaca*. Biocatalysis and Agricultural Biotechnology, 2019. **22**: p. 101431.
4. Abdalla, M.F., et al., *Flavone glycosides of Salvia triloba*. Phytochemistry, 1983. **22**(9): p. 2057-2060.
5. Saleh, N.A., et al., *Flavonoid glycosides of Artemisia monosperma and A. herba-alba*. Phytochemistry, 1985. **24**(1): p. 201-203.
6. Kelebek, H., et al., *HPLC determination of organic acids, sugars, phenolic compositions and antioxidant capacity of orange juice and orange wine made from a Turkish cv. Kozan*. Microchemical Journal, 2009. **91**(2): p. 187-192.
7. Taamalli, A., et al., *LC-MS-based metabolite profiling of methanolic extracts from the medicinal and aromatic species Mentha pulegium and Origanum majorana*. Phytochemical analysis, 2015. **26**(5): p. 320-330.
8. Kim, K.-J. and S.-K. Park, *Changes in major chemical constituents of green coffee beans during the roasting*. Korean Journal of Food Science and Technology, 2006. **38**(2): p. 153-158.
9. Janevska, S. and B. Tudzynski, *Secondary metabolism in Fusarium fujikuroi: strategies to unravel the function of biosynthetic pathways*. Applied microbiology and biotechnology, 2018. **102**(2): p. 615-630.
10. Peng, H., et al., *Major chemical constituents and antioxidant activities of different extracts from the peduncles of Hovenia acerba Lindl*. International journal of food properties, 2018. **21**(1): p. 2135-2155.
11. Kundu, A., *Vanillin biosynthetic pathways in plants*. Planta, 2017. **245**(6): p. 1069-1078.
12. Liu, M., et al., *Rapid screening of transferrin-binders in the flowers of Bauhinia blakeana Dunn by on-line high-performance liquid chromatography–diode-array detector–electrospray ionization–ion-trap–time-of-flight–mass spectrometry–transferrin–fluorescence detection system*. Journal of Chromatography A, 2016. **1450**: p. 17-28.
13. Qi, S., et al., *Phytochemical and chemotaxonomic investigation of seagrass Thalassia hemprichii (Ehrenb.) Aschers (Hydrocharitaceae)*. Biochemical Systematics and Ecology, 2012. **43**: p. 128-131.
14. Ishii, T., et al., *Tichocarpols A and B, Two Novel Phenylpropanoids with Feeding-Deterrent Activity from the Red Alga Tichocarpus c rinitus*. Journal of natural products, 2004. **67**(10): p. 1764-1766.
15. Schütz, K., et al., *Characterization of phenolic acids and flavonoids in dandelion (Taraxacum officinale WEB. ex WIGG.) root and herb by high-performance liquid chromatography/electrospray ionization mass spectrometry*. Rapid Communications in Mass Spectrometry: An International Journal Devoted to the Rapid Dissemination of Up-to-the-Minute Research in Mass Spectrometry, 2005. **19**(2): p. 179-186.
16. Xie, J., et al., *Rapid identification and determination of 11 polyphenols in Herba lycopi by HPLC–MS/MS with multiple reactions monitoring mode (MRM)*. Journal of Food Composition and Analysis, 2011. **24**(7): p. 1069-1072.
17. Neugart, S., S. Rohn, and M. Schreiner, *Identification of complex, naturally occurring flavonoid glycosides in Vicia faba and Pisum sativum leaves by HPLC-DAD-ESI-MSn and*

- the genotypic effect on their flavonoid profile. Food Research International, 2015. **76**: p. 114-121.
18. Yang, L., et al., *High-performance liquid chromatography-diode array detection/electrospray ionization mass spectrometry for the simultaneous analysis of cis-, trans-and dihydro-2-glucosyloxycinnamic acid derivatives from Dendrobium medicinal plants*. Rapid Communications in Mass Spectrometry: An International Journal Devoted to the Rapid Dissemination of Up-to-the-Minute Research in Mass Spectrometry, 2007. **21**(12): p. 1833-1840.
  19. Dias Silva, M.J., et al., *Bioassay-Guided Isolation of Fungistatic Compounds from Mimosa caesalpinhiifolia Leaves*. Journal of natural products, 2019. **82**(6): p. 1496-1502.
  20. Farag, M.A., et al., *Metabolite profiling in 18 Saudi date palm fruit cultivars and their antioxidant potential via UPLC-qTOF-MS and multivariate data analyses*. Food & function, 2016. **7**(2): p. 1077-1086.
  21. Bagri, P., et al., *New flavonoids from Punica granatum flowers*. Chemistry of natural compounds, 2010. **46**(2): p. 201-204.
  22. Aguado, M.I., et al., *Antioxidant and antibacterial activities of hydroalcoholic extracts from Aloysia polystachya griseb moldenke and Lippia turbinata griseb (verbenaceae)*. Int J Pharm Pharm Sci, 2016. **8**(3): p. 393-395.
  23. El-Ghffar, E.A.A., et al., *HPLC-ESI-MS/MS analysis of beet (Beta vulgaris) leaves and its beneficial properties in type 1 diabetic rats*. Biomedicine & Pharmacotherapy, 2019. **120**: p. 109541.
  24. Hvattum, E. and D. Ekeberg, *Study of the collision-induced radical cleavage of flavonoid glycosides using negative electrospray ionization tandem quadrupole mass spectrometry*. Journal of Mass Spectrometry, 2003. **38**(1): p. 43-49.
  25. Neveu, V., et al., *Phenol-Explorer: an online comprehensive database on polyphenol contents in foods*. Database, 2010. **2010**.
  26. Gruz, J., O. Novák, and M. Strnad, *Rapid analysis of phenolic acids in beverages by UPLC-MS/MS*. Food chemistry, 2008. **111**(3): p. 789-794.
  27. Švarc-Gajić, J., et al., *Characterisation of ginger extracts obtained by subcritical water*. The Journal of Supercritical Fluids, 2017. **123**: p. 92-100.
  28. Meng, Y., et al., *Flavones and flavone glycosides from Halophila johnsonii*. Phytochemistry, 2008. **69**(14): p. 2603-2608.
  29. Misra, B.B. and S. Dey, *Accumulation patterns of phenylpropanoids and enzymes in East Indian sandalwood tree undergoing developmental progression'in vitro'*. Australian Journal of Crop Science, 2013. **7**(5): p. 681.
  30. Papetti, A., et al., *Polyphenolic profile of green/red spotted Italian Cichorium intybus salads by RP-HPLC-PDA-ESI-MSn*. Journal of Food Composition and Analysis, 2017. **63**: p. 189-197.
  31. Mulabagal, V. and A.I. Calderón, *Liquid chromatography/mass spectrometry based fingerprinting analysis and mass profiling of Euterpe oleracea (açai) dietary supplement raw materials*. Food chemistry, 2012. **134**(2): p. 1156-1164.
  32. Tian, J., et al., *Hepatoprotective phenolic glycosides from Gymnema tingens*. Planta medica, 2013. **79**(09): p. 761-767.
  33. Hawas, U.W. and L.T. Abou El-Kassem, *Thalassiolin D: a new flavone O-glucoside Sulphate from the seagrass Thalassia hemprichii*. Natural product research, 2017. **31**(20): p. 2369-2374.
  34. Ferreres, F., et al., *HPLC-DAD-MS/MS-ESI screening of phenolic compounds in Pieris brassicae L. reared on Brassica rapa var. rapa L*. Journal of agricultural and food chemistry, 2008. **56**(3): p. 844-853.
  35. Fuji, Y., et al., *Chemical characterization and biological activity in young sesame leaves (Sesamum indicum L.) and changes in iridoid and polyphenol content at different growth stages*. PloS one, 2018. **13**(3).
  36. Hofmann, T., E. Nebehaj, and L. Albert, *The high-performance liquid chromatography/multistage electrospray mass spectrometric investigation and extraction*



- optimization of beech (*Fagus sylvatica* L.) bark polyphenols. *Journal of Chromatography a*, 2015. **1393**: p. 96-105.
37. Gavagnin, M., et al., *Structure and absolute stereochemistry of syphonoside, a unique macrocyclic glycoterpenoid from marine organisms*. *The Journal of organic chemistry*, 2007. **72**(15): p. 5625-5630.
  38. Ghouti, D., et al., *Phenolic profile and in vitro bioactive potential of Saharan Juniperus phoenicea L. and Cotula cinerea (Del) growing in Algeria*. *Food & function*, 2018. **9**(9): p. 4664-4672.
  39. Zidorn, C., *Secondary metabolites of seagrasses (Alismatales and Potamogetonales; Alismatidae): Chemical diversity, bioactivity, and ecological function*. *Phytochemistry*, 2016. **124**: p. 5-28.
  40. Rowley, D.C., et al., *Thalassiolins A–C: new marine-derived inhibitors of HIV cDNA integrase*. *Bioorganic & medicinal chemistry*, 2002. **10**(11): p. 3619-3625.
  41. Sun, F., L. Shen, and Z. Ma, *Screening for ligands of human aromatase from mulberry (Mori alba L.) leaf by using high-performance liquid chromatography/tandem mass spectrometry*. *Food chemistry*, 2011. **126**(3): p. 1337-1343.
  42. Dong, C., et al., *Flavanoids from the stems of Aquilaria sinensis*. *Chinese journal of natural medicines*, 2012. **10**(4): p. 287-291.
  43. Boukhris, M.A., et al., *A dereplication strategy for the identification of new phenolic compounds from Anvillea radiata (Coss. & Durieu)*. *Comptes Rendus Chimie*, 2016. **19**(9): p. 1124-1132.
  44. Bitam, F., et al., *Chemical analysis of flavonoid constituents of the seagrass Halophila stipulacea: first finding of malonylated derivatives in marine phanerogams*. *Biochemical Systematics and Ecology*, 2010. **38**(4): p. 686-690.
  45. Barros, L., et al., *Phenolic acids determination by HPLC–DAD–ESI/MS in sixteen different Portuguese wild mushrooms species*. *Food and Chemical Toxicology*, 2009. **47**(6): p. 1076-1079.
  46. Scher, J.M., J. Zapp, and H. Becker, *Lignan derivatives from the liverwort Bazzania trilobata*. *Phytochemistry*, 2003. **62**(5): p. 769-777.
  47. Hawas, U.W., *A new 8-hydroxy flavone O-xyloside sulfate and antibacterial activity from the Egyptian seagrass Thalassia hemprichii*. *Chemistry of natural compounds*, 2014. **50**(4): p. 629-632.
  48. Cao, Y., et al., *Bioactive flavones and biflavones from Selaginella moellendorffii Hieron*. *Fitoterapia*, 2010. **81**(4): p. 253-258.
  49. Pól, J., B. Hohnová, and T. Hyötyläinen, *Characterisation of Stevia rebaudiana by comprehensive two-dimensional liquid chromatography time-of-flight mass spectrometry*. *Journal of Chromatography A*, 2007. **1150**(1-2): p. 85-92.
  50. Mollo, E., et al., *Factors promoting marine invasions: a chemoecological approach*. *Proceedings of the National Academy of Sciences*, 2008. **105**(12): p. 4582-4586.
  51. Yagi, A., et al., *Antioxidative sulphated flavonoids in leaves of Polygonum hydropiper*. *Phytochemistry*, 1994. **35**(4): p. 885-887.
  52. Han, Y., et al., *Comparative evaluation of different cultivars of Flos Chrysanthemi by an anti-inflammatory-based NF-κB reporter gene assay coupled to UPLC-Q/TOF MS with PCA and ANN*. *Journal of ethnopharmacology*, 2015. **174**: p. 387-395.
  53. Napolitano, A., et al., *Multi-class polar lipid profiling in fresh and roasted hazelnut (Corylus avellana cultivar "Tonda di Giffoni") by LC-ESI/LTQOrbitrap/MS/MSn*. *Food chemistry*, 2018. **269**: p. 125-135.
  54. Enerstvedt, K.H., M. Jordheim, and Ø.M. Andersen, *Isolation and identification of flavonoids found in Zostera marina collected in Norwegian coastal waters. Analysis of polyphenolic content in marine and aquatic angiosperms from Norwegian coastal waters*, 2016.
  55. Carazzone, C., et al., *Identification of phenolic constituents in red chicory salads (Cichorium intybus) by high-performance liquid chromatography with diode array detection and electrospray ionisation tandem mass spectrometry*. *Food Chemistry*, 2013. **138**(2-3): p. 1062-1071.

56. Khoza, B., et al., *Identification of hydroxycinnamoyl tartaric acid esters in Bidens pilosa by UPLC-tandem mass spectrometry*. South African Journal of Botany, 2016. **103**: p. 95-100.
57. Ma, Y., et al., *Separation and characterization of soluble esterified and glycoside-bound phenolic compounds in dry-blanching peanut skins by liquid chromatography–electrospray ionization mass spectrometry*. Journal of agricultural and food chemistry, 2014. **62**(47): p. 11488-11504.
58. Mohammed, M.M., et al., *Anti-influenza A virus activity of a new dihydrochalcone diglycoside isolated from the Egyptian seagrass Thalassodendron ciliatum (Forsk.) den Hartog*. Natural product research, 2014. **28**(6): p. 377-382.
59. Gong, J., et al., *Simultaneous qualitative and quantitative determination of phenylethanoid glycosides and flavanoid compounds in Callicarpa kwangtungensis Chun by HPLC-ESI-IT-TOF-MS/MS coupled with HPLC-DAD*. Analytical Methods, 2016. **8**(33): p. 6323-6336.
60. Molina-Calle, M., et al., *Development and application of a quantitative method based on LC–QqQ MS/MS for determination of steviol glycosides in Stevia leaves*. Talanta, 2016. **154**: p. 263-269.
61. Klockmann, S., et al., *Food fingerprinting: metabolomic approaches for geographical origin discrimination of hazelnuts (Corylus avellana) by UPLC-QTOF-MS*. Journal of agricultural and food chemistry, 2016. **64**(48): p. 9253-9262.
62. Seraglio, S.K.T., et al., *Development and validation of a LC-ESI-MS/MS method for the determination of phenolic compounds in honeydew honeys with the diluted-and-shoot approach*. Food Research International, 2016. **87**: p. 60-67.
63. Zheng, Y.y., et al., *Characterisation and classification of Citri Reticulatae Pericarpium varieties based on UHPLC-Q-TOF-MS/MS combined with multivariate statistical analyses*. Phytochemical Analysis, 2019. **30**(3): p. 278-291.
64. Pulfer, M. and R.C. Murphy, *Electrospray mass spectrometry of phospholipids*. Mass spectrometry reviews, 2003. **22**(5): p. 332-364.
65. Kannan, R.R.R., et al., *Phytochemical constituents, antioxidant properties and p-coumaric acid analysis in some seagrasses*. Food research international, 2013. **54**(1): p. 1229-1236.
66. Makhoulfi, E., et al., *Chemical constituents of the extract Algerian Reutera lutea (Desf.) Maire, (Apiaceae)*. Pharmacognosy Communications, 2013. **3**(2): p. 41.
67. Guan, Z., et al., *Identification and Quantitation of Phenolic Compounds from the Seed and Pomace of Perilla frutescens Using HPLC/PDA and HPLC–ESI/QTOF/MS/MS*. Phytochemical analysis, 2014. **25**(6): p. 508-513.
68. Saika, A., et al., *Screening and isolation of the liamocin-producing yeast Aureobasidium melanogenum using xylose as the sole carbon source*. Journal of Bioscience and Bioengineering, 2020. **129**(4): p. 428-434.
69. Pierson, J.T., et al., *Phytochemical extraction, characterisation and comparative distribution across four mango (Mangifera indica L.) fruit varieties*. Food chemistry, 2014. **149**: p. 253-263.
70. Kim, J.-A., et al., *Antioxidant and NF-κB inhibitory constituents isolated from Morchella esculenta*. Natural product research, 2011. **25**(15): p. 1412-1417.
71. Patil, A.D., et al., *Plakortides, novel cyclic peroxides from the sponge Plakortis halichondrioides: activators of cardiac SR-Ca<sup>2+</sup>-pumping ATPase*. Journal of natural products, 1996. **59**(3): p. 219-223.
72. Otify, A., et al., *Mechanistic evidence of Passiflora edulis (Passifloraceae) anxiolytic activity in relation to its metabolite fingerprint as revealed via LC-MS and chemometrics*. Food & function, 2015. **6**(12): p. 3807-3817.
73. Otify, A.M., et al., *Metabolites profiling of date palm (Phoenix dactylifera L.) commercial by-products (pits and pollen) in relation to its antioxidant effect: a multiplex approach of MS and NMR metabolomics*. Metabolomics, 2019. **15**(9): p. 119.
74. Gillan, F.T., R.W. Hogg, and E.A. Drew, *The sterol and fatty acid compositions of seven tropical seagrasses from North Queensland, Australia*. Phytochemistry, 1984. **23**(12): p. 2817-2821.

75. Vaskovsky, V. and S. Khotimchenko, *Chemotaxonomic approach protects against mistakes in polyunsaturated fatty acid analyses in plants*. Journal of the American Oil Chemists' Society, 1992. **69**(6): p. 598-598.
76. Goncharova, S., N. Sanina, and E. Kostetsky, *Role of lipids in molecular thermoadaptation mechanisms of seagrass Zostera marina*. 2000, Portland Press Ltd.
